# Supplementary material for: Genome-wide transcriptome analysis reveals small RNA profiles involved in early stages of stolon-to-tuber transitions in potato under photoperiodic conditions
Source: BMC Plant Biol. 2018 Nov 16;18:284. doi: 10.1186/s12870-018-1501-4 (PMC6238349; doi:10.1186/s12870-018-1501-4)
Supplement: Supplementary file 5 — Table S4. DE analysis- Novel miRNAs (XLSX 113 kb) [file 12870_2018_1501_MOESM5_ESM.xlsx]

## Sheet: LD4 vs SD4
Table S4. DE analysis- Novel miRNAs. LD4 vs SD4. Differentially expressed miRNAs highlighted in red.
Gene	baseMean	log2FoldChange	lfcSE	stat	pvalue	padj	SO_5642_LD4A_partial1_R1_novel.count	SO_5642_LD4B_R1_novel.count	SO_5642_SD4A_R1_novel.count	SO_5642_SD4B_R1_novel.count
stu-novel-miR-302	185.175	-1.38807	0.213481	-6.5021	7.92e-11	5.07e-09	282.809	282.612	82.5739	92.7053
stu-novel-miR-147	504.357	1.01409	0.200133	5.0671	4.04e-07	1.29e-05	319.041	294.387	820.765	583.233
stu-novel-miR-93	910.763	-0.654425	0.177542	-3.68603	0.000227784	0.00361224	1049.71	1227.86	690.437	675.039
stu-novel-miR-94	910.763	-0.654425	0.177542	-3.68603	0.000227784	0.00361224	1049.71	1227.86	690.437	675.039
stu-novel-miR-40	577.612	0.657262	0.181009	3.63111	0.000282206	0.00361224	432.768	430.341	756.098	691.24
stu-novel-miR-276	967.258	0.609165	0.199045	3.06044	0.00221014	0.020207	646.133	818.932	990.887	1413.08
stu-novel-miR-277	967.258	0.609165	0.199045	3.06044	0.00221014	0.020207	646.133	818.932	990.887	1413.08
stu-novel-miR-278	2776.24	0.533862	0.185767	2.87383	0.00405527	0.0288375	1973.62	2421.47	2899.04	3810.82
stu-novel-miR-279	2776.24	0.533862	0.185767	2.87383	0.00405527	0.0288375	1973.62	2421.47	2899.04	3810.82
stu-novel-miR-221	202.724	-0.621515	0.22396	-2.77512	0.00551818	0.0353164	208.333	304.022	129.333	169.21
stu-novel-miR-268	792.351	0.528833	0.205014	2.5795	0.00989445	0.0575677	487.116	757.914	869.513	1054.86
stu-novel-miR-236	913.015	0.43458	0.175663	2.47394	0.0133634	0.0712714	725.641	794.311	1018.74	1113.36
stu-novel-miR-200	255.241	0.519788	0.215391	2.41323	0.0158117	0.0778422	211.352	188.408	370.09	251.114
stu-novel-miR-176	207.135	-0.49387	0.207262	-2.38283	0.01718	0.0785372	232.487	265.484	163.158	167.41
stu-novel-miR-134	288.086	0.446909	0.195444	2.28664	0.0222169	0.0947922	232.487	240.862	334.275	344.72
stu-novel-miR-71	513.674	-0.453233	0.20383	-2.22358	0.0261766	0.104706	603.863	612.326	506.387	332.119
stu-novel-miR-242	88.7013	-0.551669	0.258439	-2.13462	0.0327924	NA	89.5729	135.953	43.7741	85.5049
stu-novel-miR-38	10903.9	-0.347826	0.163423	-2.12838	0.0333058	0.125387	12099.4	12592.3	9936.73	8987.01
stu-novel-miR-215	27.6025	0.590964	0.278912	2.11882	0.0341054	NA	16.103	19.269	31.8357	43.2025
stu-novel-miR-157	34.785	-0.56492	0.274637	-2.05697	0.0396892	NA	41.2639	50.3135	26.8614	20.7012
stu-novel-miR-216	19.8476	0.573854	0.279991	2.04955	0.0404087	NA	11.0708	12.846	24.8717	30.6017
stu-novel-miR-191	284.819	0.427727	0.208859	2.04793	0.0405673	0.136648	206.32	263.343	292.491	377.122
stu-novel-miR-192	284.819	0.427727	0.208859	2.04793	0.0405673	0.136648	206.32	263.343	292.491	377.122
stu-novel-miR-248	45.7388	0.535174	0.26964	1.98477	0.0471695	NA	33.2124	32.115	72.6252	45.0026
stu-novel-miR-196	1225.69	0.335965	0.170704	1.96811	0.0490551	0.154489	1037.64	1097.26	1343.07	1424.78
stu-novel-miR-199	322.229	0.379132	0.194021	1.95408	0.0506916	0.154489	289.854	256.92	364.121	378.022
stu-novel-miR-100	32.3411	0.513229	0.276358	1.85712	0.0632944	NA	27.1738	18.1985	40.7895	43.2025
stu-novel-miR-308	51.2241	0.496009	0.2699	1.83775	0.0660989	NA	25.1609	50.3135	54.7177	74.7043
stu-novel-miR-201	36.1098	0.503922	0.274528	1.8356	0.0664175	NA	28.1803	23.551	37.8049	54.9031
stu-novel-miR-37	58.0832	0.473285	0.260894	1.81409	0.0696635	NA	54.3476	34.256	72.6252	71.1041
stu-novel-miR-10	405.408	-0.384715	0.213127	-1.80509	0.0710602	0.181914	462.961	477.443	423.813	257.415
stu-novel-miR-73	405.408	-0.384715	0.213127	-1.80509	0.0710602	0.181914	462.961	477.443	423.813	257.415
stu-novel-miR-85	405.408	-0.384715	0.213127	-1.80509	0.0710602	0.181914	462.961	477.443	423.813	257.415
stu-novel-miR-86	405.408	-0.384715	0.213127	-1.80509	0.0710602	0.181914	462.961	477.443	423.813	257.415
stu-novel-miR-304	83.1702	0.439006	0.24323	1.8049	0.0710909	NA	62.3991	70.653	92.5226	107.106
stu-novel-miR-222	15.9424	0.491995	0.27727	1.77443	0.0759926	NA	12.0773	7.4935	19.8973	24.3014
stu-novel-miR-225	80.9202	-0.429164	0.247281	-1.73553	0.0826462	NA	91.5858	102.768	53.7228	75.6043
stu-novel-miR-82	32.5312	0.47644	0.277081	1.71949	0.0855245	NA	20.1288	26.7625	32.8306	50.4029
stu-novel-miR-126	584.343	0.315314	0.183914	1.71446	0.0864436	0.197585	494.161	529.897	605.874	707.44
stu-novel-miR-172	584.343	0.315314	0.183914	1.71446	0.0864436	0.197585	494.161	529.897	605.874	707.44
stu-novel-miR-233	584.343	0.315314	0.183914	1.71446	0.0864436	0.197585	494.161	529.897	605.874	707.44
stu-novel-miR-240	544.572	0.293934	0.187804	1.56511	0.117558	0.247058	509.257	452.821	663.576	552.632
stu-novel-miR-166	665.932	0.275332	0.177558	1.55066	0.120984	0.247058	608.895	580.211	721.278	753.343
stu-novel-miR-167	665.932	0.275332	0.177558	1.55066	0.120984	0.247058	608.895	580.211	721.278	753.343
stu-novel-miR-281	57.8116	0.400178	0.259225	1.54375	0.12265	NA	39.2511	53.525	64.6663	73.8042
stu-novel-miR-24	27.7626	-0.429561	0.278817	-1.54065	0.123401	NA	41.2639	28.9035	22.8819	18.001
stu-novel-miR-271	2126.23	0.297108	0.192911	1.54013	0.123529	0.247058	1566.02	2181.68	2101.16	2656.05
stu-novel-miR-154	164.394	0.325733	0.214414	1.51918	0.128717	0.249632	147.946	135.953	181.066	192.611
stu-novel-miR-18	17.2138	-0.422886	0.278562	-1.5181	0.128988	NA	25.1609	20.3395	8.9538	14.4008
stu-novel-miR-202	47.4409	-0.399028	0.266564	-1.49693	0.134412	NA	64.412	50.3135	31.8357	43.2025
stu-novel-miR-287	29.0523	-0.411744	0.277831	-1.48199	0.138342	NA	39.2511	33.1855	24.8717	18.9011
stu-novel-miR-89	425.888	-0.286992	0.195765	-1.466	0.142647	0.268513	465.981	483.866	428.787	324.919
stu-novel-miR-273	14.8034	-0.404615	0.276316	-1.46432	0.143107	NA	22.1416	17.128	10.9435	9.00051
stu-novel-miR-247	29.7706	-0.402038	0.276931	-1.45176	0.146568	NA	36.2318	37.4675	22.8819	22.5013
stu-novel-miR-70	79.844	0.352757	0.243889	1.44638	0.14807	NA	69.4442	64.23	97.4969	88.205
stu-novel-miR-211	57.9816	-0.373837	0.259547	-1.44034	0.14977	NA	57.3669	80.2875	44.769	49.5028
stu-novel-miR-245	11.03	-0.375492	0.267836	-1.40194	0.160932	NA	17.1094	12.846	6.96406	7.20041
stu-novel-miR-111	75.6717	0.340842	0.247634	1.37639	0.1687	NA	71.4571	55.666	85.5585	90.0051
stu-novel-miR-299	31.7897	0.37251	0.27576	1.35085	0.176743	NA	24.1545	25.692	36.8101	40.5023
stu-novel-miR-25	102.61	0.317022	0.237965	1.33222	0.182788	NA	98.6309	77.076	130.327	104.406
stu-novel-miR-212	14.3399	-0.366217	0.27562	-1.32871	0.183945	NA	19.1223	18.1985	11.9384	8.10046
stu-novel-miR-220	477.169	-0.251663	0.190526	-1.32088	0.18654	0.341102	469	581.281	412.87	445.525
stu-novel-miR-178	30.5127	0.363069	0.277122	1.31014	0.190148	NA	23.1481	24.6215	42.7793	31.5018
stu-novel-miR-21	78.5084	-0.321509	0.247395	-1.29958	0.193746	NA	85.5472	95.2745	56.7074	76.5044
stu-novel-miR-81	78.5084	-0.321509	0.247395	-1.29958	0.193746	NA	85.5472	95.2745	56.7074	76.5044
stu-novel-miR-182	12.6948	-0.347834	0.268322	-1.29633	0.194862	NA	25.1609	8.564	8.9538	8.10046
stu-novel-miR-58	23.6915	0.362253	0.280208	1.2928	0.196079	NA	11.0708	24.6215	24.8717	34.202
stu-novel-miR-22	37.9477	-0.34853	0.271358	-1.28439	0.199005	NA	42.2704	48.1725	29.846	31.5018
stu-novel-miR-139	28.4416	-0.358422	0.279838	-1.28082	0.200257	NA	40.2575	29.974	12.9333	30.6017
stu-novel-miR-158	69.8018	-0.32238	0.252303	-1.27775	0.201338	NA	76.4893	84.5695	68.6458	49.5028
stu-novel-miR-61	23.6617	0.355215	0.279926	1.26896	0.204455	NA	17.1094	19.269	25.8665	32.4019
stu-novel-miR-266	115.796	0.304895	0.242508	1.25725	0.208662	NA	103.663	95.2745	166.143	98.1056
stu-novel-miR-101	373.425	-0.234591	0.189293	-1.2393	0.215235	0.372298	425.723	390.732	344.224	333.019
stu-novel-miR-109	373.425	-0.234591	0.189293	-1.2393	0.215235	0.372298	425.723	390.732	344.224	333.019
stu-novel-miR-254	51.2993	0.309298	0.262885	1.17655	0.239374	NA	37.2382	49.243	55.7125	63.0036
stu-novel-miR-208	17.2006	0.322764	0.278831	1.15756	0.247043	NA	13.0837	12.846	24.8717	18.001
stu-novel-miR-105	15.7823	-0.303784	0.276941	-1.09693	0.272673	NA	23.1481	16.0575	14.923	9.00051
stu-novel-miR-17	15.7823	-0.303784	0.276941	-1.09693	0.272673	NA	23.1481	16.0575	14.923	9.00051
stu-novel-miR-69	543.385	0.219327	0.203416	1.07822	0.280934	0.473152	430.755	558.801	495.443	688.539
stu-novel-miR-274	10.5002	-0.286277	0.266493	-1.07424	0.282717	NA	14.0901	12.846	6.96406	8.10046
stu-novel-miR-289	10.5002	-0.286277	0.266493	-1.07424	0.282717	NA	14.0901	12.846	6.96406	8.10046
stu-novel-miR-75	24.0437	0.29577	0.280072	1.05605	0.290945	NA	14.0901	24.6215	26.8614	30.6017
stu-novel-miR-198	301.013	0.206164	0.197199	1.04547	0.295808	0.485428	296.899	254.779	338.255	314.118
stu-novel-miR-35	13.1663	-0.281933	0.272648	-1.03406	0.30111	NA	21.1352	11.7755	8.9538	10.8006
stu-novel-miR-87	10.6884	0.273946	0.266437	1.02818	0.303864	NA	7.04506	8.564	10.9435	16.2009
stu-novel-miR-269	121.152	0.234233	0.228359	1.02572	0.305022	NA	97.6244	119.896	139.281	127.807
stu-novel-miR-19	11.5405	-0.275849	0.269698	-1.02281	0.306399	NA	15.0966	13.9165	9.94866	7.20041
stu-novel-miR-138	93.0804	-0.263366	0.260328	-1.01167	0.311695	NA	96.618	114.543	47.7536	113.406
stu-novel-miR-14	37.422	-0.274386	0.271626	-1.01016	0.312418	NA	42.2704	43.8905	33.8255	29.7017
stu-novel-miR-206	4.76386	-0.219283	0.21834	-1.00432	0.315226	NA	10.0644	3.2115	3.97947	1.8001
stu-novel-miR-253	11.8826	-0.267802	0.268102	-0.998881	0.317852	NA	17.1094	12.846	4.97433	12.6007
stu-novel-miR-298	37.7206	0.270835	0.27233	0.994509	0.319975	NA	37.2382	26.7625	42.7793	44.1025
stu-novel-miR-179	29.8237	0.274731	0.27733	0.990629	0.321867	NA	24.1545	25.692	29.846	39.6023
stu-novel-miR-239	134.699	0.219176	0.221641	0.98888	0.322722	0.516355	116.747	127.389	145.25	149.409
stu-novel-miR-142	10.5896	0.262499	0.265588	0.988367	0.322973	NA	8.0515	7.4935	16.9127	9.90057
stu-novel-miR-244	34.8992	0.271082	0.274636	0.987058	0.323614	NA	32.206	26.7625	33.8255	46.8027
stu-novel-miR-60	43.0631	0.260206	0.270626	0.961498	0.336302	NA	35.2253	38.538	60.6869	37.8022
stu-novel-miR-249	74.7252	0.23598	0.249301	0.94657	0.343858	NA	65.4184	67.4415	70.6355	95.4055
stu-novel-miR-280	9.00462	-0.240187	0.256344	-0.936971	0.348773	NA	8.0515	14.987	3.97947	9.00051
stu-novel-miR-256	34.8451	-0.255764	0.27351	-0.935118	0.349728	NA	42.2704	37.4675	30.8409	28.8016
stu-novel-miR-292	6314.26	0.16008	0.173153	0.924496	0.355228	0.55118	5343.18	6502.21	6308.45	7103.21
stu-novel-miR-237	98.1574	-0.216467	0.235402	-0.919561	0.357802	NA	114.734	100.627	84.5636	92.7053
stu-novel-miR-235	572.163	-0.167533	0.183676	-0.912108	0.361712	0.55118	627.011	593.057	493.454	575.133
stu-novel-miR-184	24.7178	0.253243	0.279779	0.905154	0.365384	NA	25.1609	16.0575	28.8511	28.8016
stu-novel-miR-284	28.3222	0.250436	0.278142	0.900391	0.367912	NA	20.1288	27.833	33.8255	31.5018
stu-novel-miR-300	12.3857	-0.241648	0.269547	-0.896497	0.369987	NA	10.0644	20.3395	11.9384	7.20041
stu-novel-miR-67	25.885	0.247869	0.279512	0.88679	0.375192	NA	24.1545	19.269	35.8152	24.3014
stu-novel-miR-170	48.6377	-0.23252	0.266214	-0.873432	0.382428	NA	48.309	61.0185	34.8203	50.4029
stu-novel-miR-95	11.9727	0.236042	0.270833	0.87154	0.383459	NA	8.0515	10.705	12.9333	16.2009
stu-novel-miR-9	131.584	-0.193228	0.222558	-0.868214	0.385277	NA	147.946	137.024	124.358	117.007
stu-novel-miR-11	21.0019	-0.238463	0.280217	-0.850995	0.394772	NA	22.1416	26.7625	18.9025	16.2009
stu-novel-miR-171	33.8492	-0.232464	0.274203	-0.847779	0.396561	NA	40.2575	36.397	30.8409	27.9016
stu-novel-miR-243	37.1143	0.229866	0.274925	0.836107	0.403094	NA	29.1867	35.3265	30.8409	53.103
stu-novel-miR-115	165.104	0.183572	0.220635	0.832018	0.405399	0.570531	168.075	135.953	197.978	158.409
stu-novel-miR-123	165.104	0.183572	0.220635	0.832018	0.405399	0.570531	168.075	135.953	197.978	158.409
stu-novel-miR-185	24.378	-0.230593	0.279547	-0.82488	0.40944	NA	28.1803	27.833	19.8973	21.6012
stu-novel-miR-161	7.02133	0.20264	0.246447	0.822248	0.410936	NA	6.03863	4.282	6.96406	10.8006
stu-novel-miR-258	92.044	0.192219	0.2372	0.810366	0.41773	NA	82.5279	85.64	96.502	103.506
stu-novel-miR-257	176.981	-0.171585	0.212308	-0.808185	0.418984	0.570531	178.139	201.254	170.122	158.409
stu-novel-miR-285	176.981	-0.171585	0.212308	-0.808185	0.418984	0.570531	178.139	201.254	170.122	158.409
stu-novel-miR-3	176.981	-0.171585	0.212308	-0.808185	0.418984	0.570531	178.139	201.254	170.122	158.409
stu-novel-miR-104	15.0418	-0.218451	0.275748	-0.792211	0.428238	NA	12.0773	23.551	11.9384	12.6007
stu-novel-miR-160	18.6215	0.219434	0.279624	0.784747	0.432602	NA	13.0837	18.1985	18.9025	24.3014
stu-novel-miR-175	18.6215	0.219434	0.279624	0.784747	0.432602	NA	13.0837	18.1985	18.9025	24.3014
stu-novel-miR-305	22.2192	-0.21348	0.280161	-0.761992	0.446065	NA	26.1674	24.6215	21.8871	16.2009
stu-novel-miR-119	34.8194	0.208571	0.27404	0.761096	0.4466	NA	29.1867	32.115	43.7741	34.202
stu-novel-miR-231	54.1685	-0.19595	0.260325	-0.752711	0.451624	NA	65.4184	53.525	52.7279	45.0026
stu-novel-miR-102	11.1983	-0.201073	0.267662	-0.751222	0.452519	NA	17.1094	9.6345	9.94866	8.10046
stu-novel-miR-290	27.2161	-0.204149	0.278542	-0.73292	0.463607	NA	29.1867	32.115	26.8614	20.7012
stu-novel-miR-307	13.7646	-0.201174	0.275002	-0.731537	0.464451	NA	15.0966	17.128	12.9333	9.90057
stu-novel-miR-131	28.2808	-0.200428	0.278491	-0.719693	0.471714	NA	27.1738	36.397	28.8511	20.7012
stu-novel-miR-107	71.8183	0.180675	0.251133	0.719442	0.471869	NA	76.4893	54.5955	80.5842	75.6043
stu-novel-miR-23	84.3035	0.173307	0.242932	0.713396	0.475601	NA	86.5536	68.512	88.5431	93.6053
stu-novel-miR-148	18.6075	-0.198032	0.279058	-0.709645	0.477924	NA	18.1159	24.6215	20.8922	10.8006
stu-novel-miR-193	61.3197	0.181221	0.25784	0.70284	0.482155	NA	65.4184	46.0315	72.6252	61.2035
stu-novel-miR-145	17.117	-0.195202	0.278982	-0.699693	0.484119	NA	21.1352	18.1985	12.9333	16.2009
stu-novel-miR-114	400.171	0.139963	0.200325	0.698677	0.484754	0.646338	425.723	328.643	465.597	380.722
stu-novel-miR-183	34.2816	0.188242	0.274564	0.685602	0.492964	NA	33.2124	27.833	42.7793	33.3019
stu-novel-miR-48	56.3794	0.176577	0.260275	0.678422	0.497504	NA	53.3412	49.243	71.6304	51.3029
stu-novel-miR-264	12.3848	-0.18202	0.271687	-0.669962	0.502882	NA	17.1094	11.7755	8.9538	11.7007
stu-novel-miR-92	59.4157	0.173558	0.260885	0.665268	0.505879	NA	62.3991	46.0315	52.7279	76.5044
stu-novel-miR-164	43.825	0.178794	0.268808	0.665136	0.505964	NA	34.2189	44.961	54.7177	41.4024
stu-novel-miR-150	14.4669	-0.182476	0.275645	-0.661996	0.507974	NA	13.0837	20.3395	10.9435	13.5008
stu-novel-miR-36	14.4669	-0.182476	0.275645	-0.661996	0.507974	NA	13.0837	20.3395	10.9435	13.5008
stu-novel-miR-59	11.821	0.177963	0.269384	0.660632	0.508848	NA	12.0773	7.4935	16.9127	10.8006
stu-novel-miR-128	4.98662	-0.148912	0.226763	-0.656685	0.511383	NA	6.03863	6.423	2.9846	4.50026
stu-novel-miR-55	4.98662	-0.148912	0.226763	-0.656685	0.511383	NA	6.03863	6.423	2.9846	4.50026
stu-novel-miR-13	15.8807	-0.1805	0.277721	-0.649933	0.515736	NA	17.1094	19.269	10.9435	16.2009
stu-novel-miR-122	15.8333	-0.179096	0.276858	-0.646887	0.517705	NA	17.1094	19.269	8.9538	18.001
stu-novel-miR-293	10.0824	0.164891	0.256735	0.642261	0.520704	NA	12.0773	4.282	5.9692	18.001
stu-novel-miR-62	51.5065	-0.166198	0.263609	-0.630469	0.528388	NA	61.3927	50.3135	54.7177	39.6023
stu-novel-miR-137	35.1024	-0.171653	0.274143	-0.626145	0.53122	NA	32.206	44.961	30.8409	32.4019
stu-novel-miR-310	35.1024	-0.171653	0.274143	-0.626145	0.53122	NA	32.206	44.961	30.8409	32.4019
stu-novel-miR-12	8.31395	0.157012	0.255001	0.615731	0.538072	NA	5.03219	8.564	7.95893	11.7007
stu-novel-miR-283	144.243	-0.135146	0.221934	-0.608949	0.542558	0.699267	168.075	137.024	142.266	129.607
stu-novel-miR-15	9.28888	-0.154421	0.258797	-0.596687	0.550716	NA	12.0773	9.6345	10.9435	4.50026
stu-novel-miR-286	186.789	0.132554	0.222698	0.595219	0.551697	0.699267	145.933	206.606	174.102	220.513
stu-novel-miR-267	96.1519	-0.139458	0.23507	-0.593261	0.553007	NA	102.657	101.697	87.5482	92.7053
stu-novel-miR-246	36.9792	0.160639	0.274653	0.584878	0.558629	NA	41.2639	25.692	46.7587	34.202
stu-novel-miR-110	12.7755	0.15727	0.272217	0.577737	0.563442	NA	8.0515	13.9165	12.9333	16.2009
stu-novel-miR-98	12.7755	0.15727	0.272217	0.577737	0.563442	NA	8.0515	13.9165	12.9333	16.2009
stu-novel-miR-66	17.6734	0.161362	0.279425	0.57748	0.563615	NA	16.103	14.987	18.9025	20.7012
stu-novel-miR-135	19.5816	-0.16024	0.279559	-0.573188	0.566518	NA	19.1223	24.6215	22.8819	11.7007
stu-novel-miR-53	29722.3	0.0943324	0.164823	0.572326	0.567101	0.699267	26936.3	30360.4	29616.2	31976.1
stu-novel-miR-52	29676.7	0.0941014	0.164867	0.570771	0.568155	0.699267	26889	30325.1	29564.4	31928.4
stu-novel-miR-1	11.4935	0.153906	0.269727	0.5706	0.568271	NA	11.0708	8.564	11.9384	14.4008
stu-novel-miR-127	11.8392	-0.15257	0.268356	-0.568534	0.569672	NA	11.0708	16.0575	13.9281	6.30036
stu-novel-miR-210	17.1538	-0.157236	0.279155	-0.563257	0.57326	NA	19.1223	19.269	14.923	15.3009
stu-novel-miR-51	8.53759	-0.141974	0.256217	-0.554115	0.5795	NA	7.04506	12.846	7.95893	6.30036
stu-novel-miR-173	21.4327	0.154451	0.280213	0.55119	0.581503	NA	21.1352	17.128	25.8665	21.6012
stu-novel-miR-174	21.4327	0.154451	0.280213	0.55119	0.581503	NA	21.1352	17.128	25.8665	21.6012
stu-novel-miR-144	20.933	0.153312	0.280218	0.547119	0.584297	NA	17.1094	20.3395	22.8819	23.4013
stu-novel-miR-219	34.0481	0.149802	0.275192	0.544356	0.586196	NA	31.1996	31.0445	29.846	44.1025
stu-novel-miR-132	20.904	-0.151629	0.27971	-0.542092	0.587755	NA	25.1609	21.41	10.9435	26.1015
stu-novel-miR-188	24.7835	0.151578	0.27969	0.54195	0.587853	NA	20.1288	24.6215	22.8819	31.5018
stu-novel-miR-77	54.6395	0.140227	0.258751	0.541939	0.58786	NA	51.3283	50.3135	55.7125	61.2035
stu-novel-miR-291	115.363	-0.130412	0.241409	-0.540212	0.589051	NA	131.843	112.402	135.302	81.9047
stu-novel-miR-16	34.5588	-0.146124	0.273751	-0.533784	0.593491	NA	34.2189	40.679	31.8357	31.5018
stu-novel-miR-84	34.5588	-0.146124	0.273751	-0.533784	0.593491	NA	34.2189	40.679	31.8357	31.5018
stu-novel-miR-31	24.5094	-0.148729	0.279627	-0.531883	0.594807	NA	30.1931	23.551	20.8922	23.4013
stu-novel-miR-163	147.817	-0.118018	0.225115	-0.524257	0.6001	0.724649	160.024	150.94	117.394	162.909
stu-novel-miR-309	31.7862	-0.144407	0.277219	-0.520913	0.602427	NA	40.2575	28.9035	22.8819	35.102
stu-novel-miR-117	105.914	-0.119557	0.231043	-0.517466	0.604831	NA	112.721	110.261	103.466	97.2056
stu-novel-miR-118	105.914	-0.119557	0.231043	-0.517466	0.604831	NA	112.721	110.261	103.466	97.2056
stu-novel-miR-152	105.914	-0.119557	0.231043	-0.517466	0.604831	NA	112.721	110.261	103.466	97.2056
stu-novel-miR-124	103.387	0.121176	0.234531	0.516673	0.605384	NA	87.5601	108.12	104.461	113.406
stu-novel-miR-209	72.084	-0.134389	0.263353	-0.5103	0.609842	NA	62.3991	92.063	44.769	89.1051
stu-novel-miR-197	18.4728	0.140188	0.279739	0.501139	0.616274	NA	18.1159	14.987	21.8871	18.9011
stu-novel-miR-241	14.7497	-0.136726	0.274625	-0.497866	0.618579	NA	19.1223	13.9165	7.95893	18.001
stu-novel-miR-125	20.899	-0.138667	0.279982	-0.495272	0.620408	NA	16.103	29.974	15.9179	21.6012
stu-novel-miR-255	35.7775	-0.135423	0.273801	-0.494606	0.620878	NA	32.206	44.961	30.8409	35.102
stu-novel-miR-272	428.779	-0.0960884	0.195911	-0.490469	0.623802	0.739321	446.858	444.257	354.172	469.827
stu-novel-miR-180	73.635	-0.121543	0.248759	-0.488597	0.625127	NA	77.4957	78.1465	78.5944	60.3034
stu-novel-miR-181	27.6779	-0.135004	0.2791	-0.483712	0.62859	NA	33.2124	26.7625	31.8357	18.9011
stu-novel-miR-224	47.5102	-0.130562	0.270516	-0.482642	0.62935	NA	51.3283	50.3135	58.6971	29.7017
stu-novel-miR-275	24.2694	0.128117	0.279751	0.457968	0.646976	NA	24.1545	20.3395	22.8819	29.7017
stu-novel-miR-213	16.2234	0.12522	0.2776	0.451079	0.651933	NA	11.0708	18.1985	14.923	20.7012
stu-novel-miR-214	16.2234	0.12522	0.2776	0.451079	0.651933	NA	11.0708	18.1985	14.923	20.7012
stu-novel-miR-295	50.4427	-0.118062	0.261923	-0.450752	0.652168	NA	52.3348	54.5955	50.7382	44.1025
stu-novel-miR-26	1545.87	0.0770757	0.171784	0.448677	0.653665	0.760628	1581.11	1418.41	1516.18	1667.8
stu-novel-miR-238	56.7617	-0.116363	0.261564	-0.444876	0.65641	NA	64.412	55.666	64.6663	42.3024
stu-novel-miR-56	15.0702	-0.121431	0.276446	-0.439258	0.660475	NA	16.103	17.128	9.94866	17.101
stu-novel-miR-106	38.3671	0.118927	0.27164	0.437811	0.661523	NA	33.2124	38.538	35.8152	45.9026
stu-novel-miR-63	34.0473	-0.119621	0.274003	-0.436569	0.662424	NA	34.2189	38.538	32.8306	30.6017
stu-novel-miR-64	34.0473	-0.119621	0.274003	-0.436569	0.662424	NA	34.2189	38.538	32.8306	30.6017
stu-novel-miR-65	103.582	0.102103	0.233943	0.436444	0.662515	NA	105.676	92.063	100.482	116.107
stu-novel-miR-186	31.7093	0.120037	0.275954	0.434989	0.663571	NA	33.2124	25.692	32.8306	35.102
stu-novel-miR-187	31.7093	0.120037	0.275954	0.434989	0.663571	NA	33.2124	25.692	32.8306	35.102
stu-novel-miR-153	31.7767	0.119594	0.277444	0.431057	0.666427	NA	31.1996	27.833	24.8717	43.2025
stu-novel-miR-108	13.7671	-0.116356	0.274081	-0.424533	0.671177	NA	11.0708	19.269	13.9281	10.8006
stu-novel-miR-78	22.0711	0.117177	0.280212	0.418175	0.67582	NA	19.1223	21.41	28.8511	18.9011
stu-novel-miR-79	22.0711	0.117177	0.280212	0.418175	0.67582	NA	19.1223	21.41	28.8511	18.9011
stu-novel-miR-80	56.9867	-0.108402	0.261077	-0.41521	0.677988	NA	64.412	55.666	64.6663	43.2025
stu-novel-miR-34	10.5278	0.1102	0.265744	0.414684	0.678373	NA	8.0515	10.705	8.9538	14.4008
stu-novel-miR-227	38.6097	0.112235	0.270926	0.414266	0.67868	NA	39.2511	33.1855	38.7998	43.2025
stu-novel-miR-7	11.6691	-0.110181	0.269354	-0.409057	0.682498	NA	16.103	9.6345	11.9384	9.00051
stu-novel-miR-207	1925.24	-0.0692319	0.172428	-0.401512	0.688043	0.784134	2116.54	1836.98	1969.84	1777.6
stu-novel-miR-97	12.2344	0.107009	0.268023	0.399251	0.689708	NA	10.0644	11.7755	19.8973	7.20041
stu-novel-miR-8	47.0924	-0.105691	0.264798	-0.399137	0.689792	NA	54.3476	44.961	46.7587	42.3024
stu-novel-miR-5	20.3558	-0.111188	0.278825	-0.398772	0.690062	NA	31.1996	12.846	23.8768	13.5008
stu-novel-miR-294	67.8756	-0.0998626	0.251661	-0.396814	0.691504	NA	70.4506	71.7235	72.6252	56.7032
stu-novel-miR-76	50.587	-0.102532	0.263623	-0.388935	0.697324	NA	60.3863	46.0315	52.7279	43.2025
stu-novel-miR-32	260.737	0.0801082	0.206719	0.387523	0.698369	0.784134	287.841	216.241	261.65	277.216
stu-novel-miR-218	23.4813	0.10773	0.280179	0.384504	0.700605	NA	21.1352	22.4805	17.9076	32.4019
stu-novel-miR-46	58.716	-0.096639	0.257814	-0.374841	0.707779	NA	69.4442	53.525	59.692	52.203
stu-novel-miR-140	89.0624	0.0902147	0.244818	0.368497	0.712503	NA	92.5923	78.1465	76.6047	108.906
stu-novel-miR-151	19.7987	-0.102081	0.280134	-0.364401	0.715558	NA	22.1416	20.3395	16.9127	19.8011
stu-novel-miR-103	26.1501	0.100013	0.279205	0.358206	0.720189	NA	20.1288	28.9035	25.8665	29.7017
stu-novel-miR-133	57.1282	-0.0927312	0.261552	-0.354542	0.722933	NA	51.3283	68.512	44.769	63.9037
stu-novel-miR-96	82.9448	-0.0849514	0.242502	-0.350313	0.726104	NA	84.5408	87.781	86.5534	72.9042
stu-novel-miR-155	15.6375	0.0957845	0.27685	0.34598	0.729358	NA	18.1159	10.705	13.9281	19.8011
stu-novel-miR-2	24.3601	0.0951113	0.279679	0.340073	0.733802	NA	21.1352	24.6215	22.8819	28.8016
stu-novel-miR-270	24.3601	0.0951113	0.279679	0.340073	0.733802	NA	21.1352	24.6215	22.8819	28.8016
stu-novel-miR-296	24.3601	0.0951113	0.279679	0.340073	0.733802	NA	21.1352	24.6215	22.8819	28.8016
stu-novel-miR-168	776.211	0.0634137	0.186854	0.339376	0.734327	0.810291	749.796	763.266	902.344	689.439
stu-novel-miR-260	13.966	0.0912068	0.27223	0.335036	0.737598	NA	19.1223	6.423	15.9179	14.4008
stu-novel-miR-282	14.9364	-0.0899098	0.276308	-0.325397	0.744881	NA	18.1159	13.9165	16.9127	10.8006
stu-novel-miR-33	12.4739	-0.0865646	0.271193	-0.3192	0.749575	NA	15.0966	11.7755	14.923	8.10046
stu-novel-miR-297	17.6472	0.085706	0.279038	0.307148	0.758731	NA	20.1288	12.846	16.9127	20.7012
stu-novel-miR-156	1.73721	-0.048353	0.157494	-0.307015	0.758832	NA	2.01288	2.141	0.994866	1.8001
stu-novel-miR-4	1.73721	-0.048353	0.157494	-0.307015	0.758832	NA	2.01288	2.141	0.994866	1.8001
stu-novel-miR-217	138.008	-0.0674633	0.224553	-0.300434	0.763846	0.827773	147.946	135.953	150.225	117.907
stu-novel-miR-39	76.7465	-0.0723559	0.244545	-0.29588	0.767322	NA	80.515	78.1465	73.6201	74.7043
stu-novel-miR-250	14.1537	-0.0797421	0.27534	-0.289614	0.772112	NA	12.0773	18.1985	11.9384	14.4008
stu-novel-miR-68	1039.76	-0.0532494	0.187176	-0.284488	0.776037	0.827773	1188.6	934.546	1114.25	921.653
stu-novel-miR-301	9.64085	0.0725951	0.261842	0.277248	0.78159	NA	6.03863	11.7755	9.94866	10.8006
stu-novel-miR-288	10.0297	0.0718922	0.264082	0.272234	0.785442	NA	11.0708	7.4935	8.9538	12.6007
stu-novel-miR-130	20.3954	0.0757114	0.280027	0.270372	0.786874	NA	17.1094	21.41	26.8614	16.2009
stu-novel-miR-165	52.0965	-0.071199	0.263753	-0.269946	0.787202	NA	49.3154	58.8775	40.7895	59.4034
stu-novel-miR-251	9.10116	-0.0692227	0.259395	-0.266862	0.789575	NA	11.0708	8.564	5.9692	10.8006
stu-novel-miR-43	141.235	0.0587315	0.221766	0.264836	0.791136	0.830044	149.959	125.248	150.225	139.508
stu-novel-miR-190	4.73212	-0.0586084	0.223387	-0.262363	0.793042	NA	4.02575	6.423	3.97947	4.50026
stu-novel-miR-205	4.73212	-0.0586084	0.223387	-0.262363	0.793042	NA	4.02575	6.423	3.97947	4.50026
stu-novel-miR-259	41.8631	0.069877	0.271789	0.2571	0.797101	NA	29.1867	51.384	42.7793	44.1025
stu-novel-miR-149	81.0219	0.0614364	0.243533	0.252271	0.800832	NA	84.5408	72.794	87.5482	79.2045
stu-novel-miR-311	35.9237	-0.0684382	0.272613	-0.251046	0.801779	NA	39.2511	35.3265	35.8152	33.3019
stu-novel-miR-6	255.768	-0.0490384	0.198485	-0.247063	0.804859	0.830822	263.687	257.99	255.681	245.714
stu-novel-miR-116	6.76545	-0.0593653	0.244247	-0.243054	0.807963	NA	6.03863	8.564	7.95893	4.50026
stu-novel-miR-136	37.5834	0.0645685	0.272459	0.236984	0.812669	NA	38.2446	34.256	32.8306	45.0026
stu-novel-miR-120	31.7477	0.0618632	0.275894	0.224228	0.82258	NA	30.1931	31.0445	28.8511	36.9021
stu-novel-miR-74	11.0073	0.059378	0.266964	0.22242	0.823987	NA	10.0644	10.705	7.95893	15.3009
stu-novel-miR-99	11.0073	0.059378	0.266964	0.22242	0.823987	NA	10.0644	10.705	7.95893	15.3009
stu-novel-miR-47	28.1503	0.0604858	0.279362	0.216514	0.828587	NA	26.1674	27.833	38.7998	19.8011
stu-novel-miR-204	24.6686	-0.0581452	0.280024	-0.207644	0.835507	NA	18.1159	33.1855	24.8717	22.5013
stu-novel-miR-223	21.5883	0.0570367	0.280209	0.20355	0.838705	NA	20.1288	21.41	16.9127	27.9016
stu-novel-miR-228	52.5542	-0.0529843	0.263133	-0.20136	0.840417	NA	50.3219	57.807	41.7844	60.3034
stu-novel-miR-143	28.4796	-0.0539876	0.278458	-0.19388	0.84627	NA	35.2253	23.551	30.8409	24.3014
stu-novel-miR-29	48.9207	0.0488596	0.262781	0.185932	0.852498	NA	49.3154	46.0315	51.7331	48.6028
stu-novel-miR-146	35.7709	-0.0498774	0.273342	-0.182473	0.855212	NA	37.2382	36.397	29.846	39.6023
stu-novel-miR-20	64.0757	0.0454576	0.254499	0.178616	0.858239	NA	68.4378	56.7365	72.6252	58.5033
stu-novel-miR-27	7.17287	0.0443958	0.248938	0.17834	0.858456	NA	6.03863	7.4935	7.95893	7.20041
stu-novel-miR-44	7.17287	0.0443958	0.248938	0.17834	0.858456	NA	6.03863	7.4935	7.95893	7.20041
stu-novel-miR-265	8.34922	-0.0442548	0.254743	-0.173723	0.862083	NA	9.05794	8.564	4.97433	10.8006
stu-novel-miR-169	51.5753	-0.0451539	0.26172	-0.172528	0.863023	NA	57.3669	48.1725	46.7587	54.0031
stu-novel-miR-234	38.1411	0.0461397	0.27244	0.169357	0.865516	NA	44.2833	29.974	37.8049	40.5023
stu-novel-miR-203	21.5856	0.04492	0.280196	0.160316	0.872632	NA	15.0966	26.7625	22.8819	21.6012
stu-novel-miR-83	17.6461	0.0425211	0.276755	0.153641	0.877892	NA	22.1416	11.7755	25.8665	10.8006
stu-novel-miR-159	14.512	-0.0401508	0.272706	-0.147231	0.88295	NA	17.1094	12.846	20.8922	7.20041
stu-novel-miR-121	24.1657	-0.0401857	0.280218	-0.143409	0.885967	NA	29.1867	20.3395	31.8357	15.3009
stu-novel-miR-112	24.9527	0.0380204	0.279372	0.136093	0.891748	NA	26.1674	22.4805	26.8614	24.3014
stu-novel-miR-177	19.6046	0.0363056	0.279861	0.129727	0.896782	NA	22.1416	16.0575	15.9179	24.3014
stu-novel-miR-226	8.08703	0.02847	0.251745	0.113091	0.909959	NA	6.03863	9.6345	4.97433	11.7007
stu-novel-miR-45	19.3721	-0.0298821	0.280009	-0.106718	0.915012	NA	17.1094	22.4805	19.8973	18.001
stu-novel-miR-195	14.8803	0.0285793	0.276631	0.103312	0.917715	NA	15.0966	13.9165	17.9076	12.6007
stu-novel-miR-189	44.0956	-0.0269176	0.266881	-0.10086	0.919661	NA	40.2575	49.243	42.7793	44.1025
stu-novel-miR-232	94.5419	-0.0238448	0.241165	-0.0988737	0.921239	NA	107.689	83.499	82.5739	104.406
stu-novel-miR-49	46.0885	-0.0259254	0.264903	-0.0978677	0.922037	NA	46.2961	47.102	47.7536	43.2025
stu-novel-miR-50	46.0885	-0.0259254	0.264903	-0.0978677	0.922037	NA	46.2961	47.102	47.7536	43.2025
stu-novel-miR-72	147.499	-0.0217203	0.222383	-0.0976707	0.922194	0.936832	145.933	152.011	127.343	164.709
stu-novel-miR-261	99.2237	-0.0216372	0.233693	-0.0925881	0.926231	NA	97.6244	102.768	97.4969	99.0057
stu-novel-miR-230	59.9828	-0.0231342	0.255726	-0.0904649	0.927918	NA	60.3863	61.0185	53.7228	64.8037
stu-novel-miR-41	59.9828	-0.0231342	0.255726	-0.0904649	0.927918	NA	60.3863	61.0185	53.7228	64.8037
stu-novel-miR-129	133.331	0.0203002	0.230443	0.0880921	0.929804	NA	153.985	110.261	122.369	146.708
stu-novel-miR-28	16.8419	0.0232671	0.27808	0.0836705	0.933318	NA	20.1288	12.846	20.8922	13.5008
stu-novel-miR-306	31.3704	0.0207225	0.276953	0.0748234	0.940355	NA	37.2382	24.6215	34.8203	28.8016
stu-novel-miR-263	44.482	0.0199735	0.2686	0.0743617	0.940723	NA	45.2897	42.82	35.8152	54.0031
stu-novel-miR-30	105.039	-0.0148122	0.233301	-0.0634894	0.949377	NA	110.708	100.627	113.415	95.4055
stu-novel-miR-113	75.9008	-0.0145562	0.246331	-0.059092	0.952879	NA	71.4571	81.358	80.5842	70.204
stu-novel-miR-42	32.0149	0.0149001	0.275787	0.0540274	0.956913	NA	29.1867	34.256	35.8152	28.8016
stu-novel-miR-262	19.0173	-0.013786	0.279943	-0.0492459	0.960723	NA	18.1159	20.3395	16.9127	20.7012
stu-novel-miR-90	45.4722	0.0106752	0.265983	0.0401349	0.967986	NA	41.2639	49.243	42.7793	48.6028
stu-novel-miR-54	431.177	-0.00556662	0.185452	-0.0300164	0.976054	0.976054	432.768	431.411	444.705	415.824
stu-novel-miR-194	15.0922	0.0073233	0.276922	0.0264453	0.978902	NA	17.1094	12.846	16.9127	13.5008
stu-novel-miR-91	25.7786	-0.00605752	0.279408	-0.0216799	0.982703	NA	29.1867	22.4805	29.846	21.6012
stu-novel-miR-252	10.5155	-0.0053163	0.256916	-0.0206928	0.983491	NA	3.01931	18.1985	10.9435	9.90057
stu-novel-miR-141	50.6621	0.00178726	0.276925	0.00645396	0.994851	NA	62.3991	38.538	75.6098	26.1015
stu-novel-miR-88	21.8074	0.000964414	0.280171	0.00344223	0.997254	NA	22.1416	21.41	23.8768	19.8011
stu-novel-miR-57	21.2276	0.000827754	0.280211	0.00295403	0.997643	NA	23.1481	19.269	20.8922	21.6012
stu-novel-miR-162	10.3797	1.25e-05	0.266472	4.7e-05	0.999963	NA	10.0644	10.705	9.94866	10.8006
stu-novel-miR-229	10.3797	1.25e-05	0.266472	4.7e-05	0.999963	NA	10.0644	10.705	9.94866	10.8006
stu-novel-miR-303	10.3797	1.25e-05	0.266472	4.7e-05	0.999963	NA	10.0644	10.705	9.94866	10.8006

## Sheet: LD7 vs SD7
Table S4. DE analysis- Novel miRNAs. LD7 vs SD7.
Gene	baseMean	log2FoldChange	lfcSE	stat	pvalue	padj	SO_5642_LD7A_partial1_R1_novel.count	SO_5642_LD7B_R1_novel.count	SO_5642_SD7A_R1_novel.count	SO_5642_SD7B_R1_novel.count
stu-novel-miR-1	14.9904	-0.0515059	0.205644	-0.250461	0.802231	0.998981	18.9971	13.2676	16.1466	11.5502
stu-novel-miR-10	319.686	-0.440793	0.226769	-1.9438	0.0519199	0.998981	322.951	460.828	198.509	296.455
stu-novel-miR-100	27.5614	0.0494021	0.225062	0.219505	0.826257	0.998981	16.6225	35.3802	35.1427	23.1004
stu-novel-miR-101	350.19	-0.231585	0.217215	-1.06616	0.286353	0.998981	362.133	416.602	269.744	352.28
stu-novel-miR-102	10.7899	-0.134737	0.186077	-0.724095	0.469008	0.998981	8.31125	18.5746	6.64861	9.62515
stu-novel-miR-103	24.6358	-0.203482	0.222388	-0.914986	0.360199	0.998981	35.6196	24.7662	25.6446	12.5127
stu-novel-miR-104	17.3845	-0.145427	0.208404	-0.69781	0.485296	0.998981	24.9337	16.8056	8.54822	19.2503
stu-novel-miR-105	14.6545	-0.10272	0.202768	-0.506591	0.612442	0.998981	14.2479	19.4591	8.54822	16.3628
stu-novel-miR-106	32.9539	0.101509	0.234502	0.43287	0.665109	0.998981	30.8703	29.1887	32.2933	39.4631
stu-novel-miR-107	63.9914	-0.0856462	0.239814	-0.357135	0.72099	0.998981	77.1759	58.3774	64.5865	55.8259
stu-novel-miR-108	13.3647	0.0197084	0.195543	0.100788	0.919719	0.998981	7.12393	18.5746	11.3976	16.3628
stu-novel-miR-109	350.19	-0.231585	0.217215	-1.06616	0.286353	0.998981	362.133	416.602	269.744	352.28
stu-novel-miR-11	12.4113	0.0252876	0.0905348	0.279314	0.780004	0.998981	18.9971	0	11.3976	19.2503
stu-novel-miR-110	11.9154	0.0277782	0.190405	0.14589	0.884008	0.998981	16.6225	6.19154	13.2972	11.5502
stu-novel-miR-111	69.8956	-0.163679	0.239242	-0.684158	0.493875	0.998981	71.2393	83.1436	66.4861	58.7134
stu-novel-miR-112	27.2902	-0.00405707	0.229322	-0.0176915	0.985885	0.998981	23.7464	30.9577	30.3937	24.0629
stu-novel-miR-113	71.8054	-0.0443547	0.238833	-0.185714	0.852669	0.998981	72.4266	75.183	68.3857	71.2261
stu-novel-miR-114	407.552	0.0225451	0.217883	0.103473	0.917587	0.998981	393.003	413.064	486.299	337.843
stu-novel-miR-115	155.544	0.0871603	0.229235	0.380222	0.703781	0.998981	131.793	164.518	175.713	150.152
stu-novel-miR-116	8.05758	-0.121091	0.16956	-0.714146	0.475137	0.998981	11.8732	8.84506	2.84941	8.66263
stu-novel-miR-117	101.11	-0.264095	0.236803	-1.11525	0.264743	0.998981	134.167	99.9492	75.0343	95.289
stu-novel-miR-118	101.11	-0.264095	0.236803	-1.11525	0.264743	0.998981	134.167	99.9492	75.0343	95.289
stu-novel-miR-119	27.9899	0.223288	0.230638	0.96813	0.332979	0.998981	20.1845	23.8817	33.2431	34.6505
stu-novel-miR-12	9.19006	0.170035	0.176482	0.963471	0.335311	0.998981	8.31125	3.53802	8.54822	16.3628
stu-novel-miR-120	31.4457	0.0182864	0.231965	0.0788324	0.937166	0.998981	30.8703	30.9577	39.8917	24.0629
stu-novel-miR-121	21.1287	0.0526353	0.220445	0.238768	0.811285	0.998981	16.6225	22.9972	25.6446	19.2503
stu-novel-miR-122	11.5822	0.0936603	0.193583	0.483826	0.62851	0.998981	10.6859	8.84506	11.3976	15.4002
stu-novel-miR-123	155.544	0.0871603	0.229235	0.380222	0.703781	0.998981	131.793	164.518	175.713	150.152
stu-novel-miR-124	97.0714	0.0584982	0.235361	0.248547	0.803711	0.998981	93.7984	93.7576	104.478	96.2515
stu-novel-miR-125	11.6894	0.0706474	0.158541	0.445609	0.65588	0.998981	18.9971	0	11.3976	16.3628
stu-novel-miR-126	539.475	0.0657698	0.206304	0.3188	0.749878	0.998981	487.989	558.123	568.931	542.858
stu-novel-miR-127	14.5875	0.0121409	0.205878	0.0589716	0.952975	0.998981	15.4352	13.2676	14.247	15.4002
stu-novel-miR-128	5.00011	0.0371401	0.13582	0.273451	0.784507	0.998981	5.93661	2.65352	10.4478	0.962515
stu-novel-miR-129	120.078	-0.0792704	0.235094	-0.337186	0.735977	0.998981	124.669	126.484	137.721	91.4389
stu-novel-miR-13	24.0776	0.126064	0.223962	0.562881	0.573516	0.998981	24.9337	16.8056	21.8454	32.7255
stu-novel-miR-130	14.8099	-0.0908895	0.204911	-0.443556	0.657364	0.998981	13.0605	20.3436	11.3976	14.4377
stu-novel-miR-131	22.4818	-0.0607218	0.222819	-0.272516	0.785225	0.998981	21.3718	26.5352	24.6948	17.3253
stu-novel-miR-132	14.026	0.174672	0.202296	0.863449	0.38789	0.998981	8.31125	12.3831	15.1968	20.2128
stu-novel-miR-133	43.624	0.385601	0.222732	1.73123	0.0834109	0.998981	43.9309	7.96055	44.6407	77.9637
stu-novel-miR-134	247.872	0.313217	0.220445	1.42084	0.155363	0.998981	211.343	207.859	318.184	254.104
stu-novel-miR-135	10.2349	-0.0620203	0.187105	-0.331473	0.740288	0.998981	9.49857	13.2676	8.54822	9.62515
stu-novel-miR-136	38.8772	-0.0798548	0.236216	-0.338058	0.735319	0.998981	33.245	49.5323	31.3435	41.3881
stu-novel-miR-137	32.097	-0.0642531	0.232563	-0.276282	0.782331	0.998981	37.9943	30.0732	23.745	36.5756
stu-novel-miR-138	84.0753	-0.278578	0.239887	-1.16129	0.245524	0.998981	104.484	96.4112	94.9802	40.4256
stu-novel-miR-139	31.8419	-0.034635	0.227374	-0.152326	0.87893	0.998981	36.807	29.1887	17.0964	44.2757
stu-novel-miR-14	42.5628	-0.315547	0.234972	-1.34291	0.1793	0.998981	48.6802	59.2619	18.996	43.3132
stu-novel-miR-140	76.9882	0.0790177	0.238616	0.33115	0.740532	0.998981	78.3632	68.107	88.3316	73.1511
stu-novel-miR-141	41.674	0.0213613	0.236354	0.0903786	0.927986	0.998981	28.4957	53.0704	39.8917	45.2382
stu-novel-miR-142	10.1493	-0.0539798	0.182276	-0.296142	0.767121	0.998981	11.8732	10.6141	13.2972	4.81257
stu-novel-miR-143	22.2548	0.18754	0.223561	0.838876	0.401539	0.998981	17.8098	17.6901	28.4941	25.0254
stu-novel-miR-144	16.1023	0.00504183	0.209442	0.0240726	0.980795	0.998981	14.2479	17.6901	18.996	13.4752
stu-novel-miR-145	21.8227	-0.0756338	0.213039	-0.355023	0.722572	0.998981	28.4957	19.4591	9.49802	29.838
stu-novel-miR-146	34.4731	0.119536	0.233974	0.510894	0.609425	0.998981	26.1211	35.3802	45.5905	30.8005
stu-novel-miR-147	512.674	0.642392	0.232588	2.76194	0.00574598	0.998981	309.891	362.648	946.952	431.207
stu-novel-miR-148	17.0158	0.0868691	0.208935	0.415771	0.677578	0.998981	9.49857	20.3436	20.8956	17.3253
stu-novel-miR-149	78.0528	-0.0141222	0.238272	-0.0592693	0.952738	0.998981	72.4266	84.9126	78.8335	76.0387
stu-novel-miR-15	9.69113	-0.189597	0.18433	-1.02857	0.303681	0.998981	13.0605	13.2676	5.69881	6.7376
stu-novel-miR-150	16.0072	-0.234376	0.209412	-1.11921	0.26305	0.998981	22.5591	19.4591	9.49802	12.5127
stu-novel-miR-151	13.3145	-0.00186238	0.0774003	-0.0240617	0.980803	0.998981	27.3084	0	2.84941	23.1004
stu-novel-miR-152	101.347	-0.259963	0.236711	-1.09823	0.272104	0.998981	134.167	99.9492	75.9841	95.289
stu-novel-miR-153	31.9288	0.101497	0.232332	0.436862	0.662212	0.998981	33.245	24.7662	41.7913	27.9129
stu-novel-miR-154	153.51	0.109289	0.231526	0.472037	0.636901	0.998981	124.669	163.634	185.211	140.527
stu-novel-miR-155	16.3421	-0.00284004	0.211032	-0.0134579	0.989262	0.998981	17.8098	15.0366	15.1968	17.3253
stu-novel-miR-156	1.63904	0.0464484	0.0891924	0.520766	0.60253	0.998981	0	1.76901	1.8996	2.88754
stu-novel-miR-157	38.3225	-0.308379	0.23529	-1.31064	0.189981	0.998981	56.9914	39.8028	21.8454	34.6505
stu-novel-miR-158	67.5626	0.0365237	0.236221	0.154617	0.877123	0.998981	77.1759	53.9549	33.2431	105.877
stu-novel-miR-159	8.0352	-0.0226923	0.167665	-0.135343	0.892341	0.998981	3.56196	13.2676	6.64861	8.66263
stu-novel-miR-16	36.8349	-0.0626863	0.235675	-0.265986	0.79025	0.998981	33.245	44.2253	29.4439	40.4256
stu-novel-miR-160	19.835	0.0515068	0.219473	0.234684	0.814454	0.998981	17.8098	19.4591	20.8956	21.1753
stu-novel-miR-161	5.97659	-0.0148982	0.153756	-0.0968955	0.922809	0.998981	3.56196	8.84506	3.79921	7.70012
stu-novel-miR-162	7.98779	0.00940905	0.173378	0.0542689	0.956721	0.998981	9.49857	6.19154	7.59841	8.66263
stu-novel-miR-163	135.76	0.0853754	0.232701	0.366889	0.713702	0.998981	151.977	107.025	136.771	147.265
stu-novel-miR-164	42.2045	-0.0332019	0.237908	-0.139558	0.889009	0.998981	45.1182	41.5718	48.4399	33.688
stu-novel-miR-165	49.8146	-0.0694842	0.239423	-0.290215	0.771652	0.998981	49.8675	54.8394	55.0885	39.4631
stu-novel-miR-166	632.907	0.234766	0.207532	1.13123	0.257959	0.998981	553.292	575.813	780.737	621.785
stu-novel-miR-167	632.907	0.234766	0.207532	1.13123	0.257959	0.998981	553.292	575.813	780.737	621.785
stu-novel-miR-168	757.323	0.219631	0.212025	1.03588	0.30026	0.998981	667.274	690.799	984.944	686.273
stu-novel-miR-169	33.6232	0.171623	0.233764	0.734171	0.462844	0.998981	33.245	23.8817	44.6407	32.7255
stu-novel-miR-17	14.6545	-0.10272	0.202768	-0.506591	0.612442	0.998981	14.2479	19.4591	8.54822	16.3628
stu-novel-miR-170	43.0502	0.226714	0.237847	0.953194	0.340492	0.998981	37.9943	32.7267	40.8415	60.6384
stu-novel-miR-171	30.2979	-0.160941	0.232664	-0.691731	0.489106	0.998981	36.807	32.7267	23.745	27.9129
stu-novel-miR-172	539.475	0.0657698	0.206304	0.3188	0.749878	0.998981	487.989	558.123	568.931	542.858
stu-novel-miR-173	20.2083	0.0528487	0.219047	0.241267	0.809348	0.998981	16.6225	21.2281	24.6948	18.2878
stu-novel-miR-174	20.2083	0.0528487	0.219047	0.241267	0.809348	0.998981	16.6225	21.2281	24.6948	18.2878
stu-novel-miR-175	19.835	0.0515068	0.219473	0.234684	0.814454	0.998981	17.8098	19.4591	20.8956	21.1753
stu-novel-miR-176	197.688	-0.302679	0.231439	-1.30781	0.190937	0.998981	288.519	172.479	172.864	156.89
stu-novel-miR-177	14.6041	0.134878	0.1766	0.763749	0.445017	0.998981	20.1845	0.884506	14.247	23.1004
stu-novel-miR-178	24.5828	0.202737	0.226783	0.893967	0.371339	0.998981	21.3718	17.6901	30.3937	28.8754
stu-novel-miR-179	22.2984	-0.0480806	0.221264	-0.2173	0.827975	0.998981	24.9337	22.1127	15.1968	26.9504
stu-novel-miR-18	15.5318	-0.0555255	0.206334	-0.269105	0.787849	0.998981	13.0605	20.3436	11.3976	17.3253
stu-novel-miR-180	60.0496	-0.14969	0.239864	-0.624061	0.532587	0.998981	64.1153	68.107	58.8877	49.0883
stu-novel-miR-181	29.1797	0.029615	0.229334	0.129135	0.897251	0.998981	20.1845	36.2648	27.5443	32.7255
stu-novel-miR-182	15.6629	-0.0972736	0.203712	-0.477506	0.633002	0.998981	18.9971	16.8056	7.59841	19.2503
stu-novel-miR-183	26.3024	0.0735665	0.229168	0.321016	0.748198	0.998981	24.9337	23.8817	29.4439	26.9504
stu-novel-miR-184	14.9294	-0.117882	0.203822	-0.578357	0.563023	0.998981	11.8732	22.9972	13.2972	11.5502
stu-novel-miR-185	20.2985	-0.113229	0.219753	-0.515257	0.606373	0.998981	20.1845	25.6507	18.996	16.3628
stu-novel-miR-186	27.269	0.0356689	0.230266	0.154903	0.876898	0.998981	26.1211	26.5352	27.5443	28.8754
stu-novel-miR-187	27.269	0.0356689	0.230266	0.154903	0.876898	0.998981	26.1211	26.5352	27.5443	28.8754
stu-novel-miR-188	23.601	-0.151007	0.220308	-0.685435	0.493069	0.998981	26.1211	29.1887	27.5443	11.5502
stu-novel-miR-189	41.5025	-0.114825	0.238164	-0.482124	0.629718	0.998981	46.3055	44.2253	41.7913	33.688
stu-novel-miR-19	15.7323	-0.0794213	0.204289	-0.388768	0.697448	0.998981	23.7464	11.4986	17.0964	10.5877
stu-novel-miR-190	6.04195	-0.0423658	0.154888	-0.273525	0.78445	0.998981	8.31125	5.30704	2.84941	7.70012
stu-novel-miR-191	278.3	0.0358254	0.215783	0.166025	0.868137	0.998981	275.458	271.543	269.744	296.455
stu-novel-miR-192	278.3	0.0358254	0.215783	0.166025	0.868137	0.998981	275.458	271.543	269.744	296.455
stu-novel-miR-193	62.041	-0.056133	0.239901	-0.233984	0.814998	0.998981	53.4294	75.183	56.9881	62.5635
stu-novel-miR-194	18.1521	-0.055655	0.211376	-0.263298	0.792321	0.998981	24.9337	14.1521	12.3474	21.1753
stu-novel-miR-195	11.9668	-0.0994655	0.195459	-0.508881	0.610836	0.998981	11.8732	15.9211	10.4478	9.62515
stu-novel-miR-196	1191.45	0.168738	0.202	0.835336	0.403529	0.998981	1133.89	1068.48	1419.95	1143.47
stu-novel-miR-197	18.8516	0.175302	0.215234	0.814469	0.415376	0.998981	15.4352	14.1521	28.4941	17.3253
stu-novel-miR-198	247.39	-0.0765575	0.222103	-0.344694	0.730324	0.998981	260.023	253.853	272.593	203.091
stu-novel-miR-199	312.313	-0.0636485	0.229906	-0.276845	0.781899	0.998981	338.387	307.808	392.268	210.791
stu-novel-miR-2	24.4454	0.148225	0.226487	0.654455	0.512819	0.998981	20.1845	21.2281	31.3435	25.0254
stu-novel-miR-20	60.608	0.127604	0.239913	0.531876	0.594812	0.998981	51.0548	59.2619	53.1889	78.9262
stu-novel-miR-200	232.391	0.374279	0.233007	1.6063	0.108208	0.998981	165.038	203.436	363.774	197.316
stu-novel-miR-201	32.62	0.132983	0.209644	0.634329	0.525866	0.998981	48.6802	5.30704	37.9921	38.5006
stu-novel-miR-202	45.5823	-0.172491	0.239207	-0.721096	0.47085	0.998981	53.4294	49.5323	38.9419	40.4256
stu-novel-miR-203	16.3986	0.0768171	0.209325	0.366976	0.713637	0.998981	10.6859	18.5746	18.0462	18.2878
stu-novel-miR-204	30.1502	0.137308	0.232265	0.591171	0.554406	0.998981	26.1211	26.5352	29.4439	38.5006
stu-novel-miR-205	6.04195	-0.0423658	0.154888	-0.273525	0.78445	0.998981	8.31125	5.30704	2.84941	7.70012
stu-novel-miR-206	13.2062	0.136334	0.195275	0.698165	0.485074	0.998981	7.12393	13.2676	21.8454	10.5877
stu-novel-miR-207	1733.85	-0.0488955	0.196619	-0.248682	0.803607	0.998981	1659.87	1882.23	1764.73	1628.58
stu-novel-miR-208	17.5099	0.0297974	0.214006	0.139236	0.889263	0.998981	17.8098	15.9211	19.9458	16.3628
stu-novel-miR-209	77.9306	0.137971	0.239132	0.576967	0.563962	0.998981	83.1125	59.2619	75.9841	93.3639
stu-novel-miR-21	72.9985	0.0232812	0.238841	0.0974755	0.922349	0.998981	67.6773	76.0675	70.2853	77.9637
stu-novel-miR-210	21.1216	-0.0627303	0.221596	-0.283084	0.777113	0.998981	24.9337	20.3436	18.996	20.2128
stu-novel-miR-211	86.789	-0.00728533	0.239901	-0.030368	0.975774	0.998981	98.5477	76.0675	53.1889	119.352
stu-novel-miR-212	16.2613	-0.0898986	0.209608	-0.428889	0.668004	0.998981	14.2479	22.1127	14.247	14.4377
stu-novel-miR-213	13.3164	0.145546	0.199922	0.728013	0.466606	0.998981	11.8732	8.84506	13.2972	19.2503
stu-novel-miR-214	13.3164	0.145546	0.199922	0.728013	0.466606	0.998981	11.8732	8.84506	13.2972	19.2503
stu-novel-miR-215	20.2967	0.161921	0.215552	0.751193	0.452537	0.998981	16.6225	15.9211	33.2431	15.4002
stu-novel-miR-216	15.0942	0.169195	0.206051	0.821135	0.411569	0.998981	14.2479	8.84506	18.996	18.2878
stu-novel-miR-217	117.263	-0.00133426	0.235097	-0.00567535	0.995472	0.998981	108.046	126.484	96.8798	137.64
stu-novel-miR-218	18.4463	-0.196176	0.212018	-0.925276	0.354822	0.998981	17.8098	28.3042	18.0462	9.62515
stu-novel-miR-219	27.193	-0.0491195	0.229299	-0.214216	0.830379	0.998981	33.245	23.8817	24.6948	26.9504
stu-novel-miR-22	32.1155	-0.170087	0.233957	-0.727	0.467226	0.998981	40.3689	33.6112	28.4941	25.9879
stu-novel-miR-220	494.659	-0.367269	0.222875	-1.64787	0.0993803	0.998981	667.274	504.168	314.384	492.808
stu-novel-miR-221	218.244	-0.0239652	0.234799	-0.102067	0.918704	0.998981	255.274	187.515	148.169	282.017
stu-novel-miR-222	12.7815	-0.0200515	0.196128	-0.102237	0.918568	0.998981	9.49857	16.8056	15.1968	9.62515
stu-novel-miR-223	23.1733	0.00876048	0.224771	0.0389752	0.96891	0.998981	20.1845	25.6507	22.7952	24.0629
stu-novel-miR-224	37.0975	0.000305144	0.232493	0.00131249	0.998953	0.998981	22.5591	51.3014	40.8415	33.688
stu-novel-miR-225	71.7527	-0.260618	0.239318	-1.089	0.276152	0.998981	77.1759	90.2196	52.2391	67.376
stu-novel-miR-226	21.3394	0.120768	0.219977	0.549005	0.583002	0.998981	15.4352	21.2281	29.4439	19.2503
stu-novel-miR-227	35.7157	0.0356824	0.236047	0.151167	0.879844	0.998981	32.0577	37.1493	34.1929	39.4631
stu-novel-miR-228	45.2221	-0.160532	0.239022	-0.67162	0.501825	0.998981	54.6168	46.8788	37.0423	42.3507
stu-novel-miR-229	7.98779	0.00940905	0.173378	0.0542689	0.956721	0.998981	9.49857	6.19154	7.59841	8.66263
stu-novel-miR-23	75.7885	0.201709	0.239919	0.840739	0.400494	0.998981	67.6773	62.7999	114.926	57.7509
stu-novel-miR-230	49.581	-0.0472522	0.23962	-0.197196	0.843674	0.998981	55.8041	46.8788	45.5905	50.0508
stu-novel-miR-231	52.9628	-0.0980553	0.239827	-0.408859	0.682643	0.998981	55.8041	57.4929	43.6909	54.8633
stu-novel-miR-232	76.666	-0.147488	0.239762	-0.615145	0.538459	0.998981	73.6139	94.6422	86.432	51.9758
stu-novel-miR-233	539.475	0.0657698	0.206304	0.3188	0.749878	0.998981	487.989	558.123	568.931	542.858
stu-novel-miR-234	40.1924	0.0927239	0.235149	0.394321	0.693344	0.998981	36.807	37.1493	57.9379	28.8754
stu-novel-miR-235	526.546	-0.0272012	0.205127	-0.132607	0.894504	0.998981	531.92	534.242	537.588	502.433
stu-novel-miR-236	889.045	0.188555	0.217445	0.867141	0.385864	0.998981	667.274	947.306	1135.01	806.587
stu-novel-miR-237	95.0503	0.0292915	0.237079	0.123552	0.90167	0.998981	109.234	77.8365	96.8798	96.2515
stu-novel-miR-238	49.5671	-0.0246934	0.23934	-0.103173	0.917826	0.998981	45.1182	55.7239	56.0383	41.3881
stu-novel-miR-239	109.212	0.234825	0.234524	1.00128	0.31669	0.998981	100.922	88.4506	135.822	111.652
stu-novel-miR-24	18.8103	-0.0714252	0.216753	-0.329523	0.74176	0.998981	17.8098	22.9972	16.1466	18.2878
stu-novel-miR-240	467.679	0.104542	0.2164	0.483094	0.629029	0.998981	440.496	447.56	580.329	402.331
stu-novel-miR-241	13.348	0.000255933	0.200481	0.00127659	0.998981	0.998981	10.6859	15.9211	12.3474	14.4377
stu-novel-miR-242	107.675	0.00352829	0.238904	0.0147686	0.988217	0.998981	132.98	82.2591	82.6328	132.827
stu-novel-miR-243	36.3653	-0.111238	0.235149	-0.473054	0.636174	0.998981	30.8703	48.6478	35.1427	30.8005
stu-novel-miR-244	27.855	0.0853397	0.229395	0.37202	0.709878	0.998981	30.8703	20.3436	32.2933	27.9129
stu-novel-miR-245	12.2461	-0.0373068	0.196313	-0.190038	0.84928	0.998981	15.4352	10.6141	12.3474	10.5877
stu-novel-miR-246	40.5762	-0.0783943	0.236195	-0.331905	0.739961	0.998981	55.8041	30.9577	37.0423	38.5006
stu-novel-miR-247	22.7629	0.0482839	0.223802	0.215744	0.829187	0.998981	23.7464	19.4591	20.8956	26.9504
stu-novel-miR-248	43.7458	0.155381	0.237339	0.654679	0.512674	0.998981	43.9309	32.7267	60.7873	37.5381
stu-novel-miR-249	62.6381	0.144843	0.239877	0.603822	0.545962	0.998981	58.1787	54.8394	79.7834	57.7509
stu-novel-miR-25	89.5555	0.0109143	0.238257	0.0458089	0.963463	0.998981	79.5505	98.1802	106.378	74.1136
stu-novel-miR-250	13.8995	-0.0730148	0.20289	-0.359874	0.718941	0.998981	13.0605	17.6901	13.2972	11.5502
stu-novel-miR-251	13.5652	-0.0305528	0.200559	-0.152338	0.87892	0.998981	14.2479	14.1521	9.49802	16.3628
stu-novel-miR-252	12.3381	-0.0383193	0.190854	-0.200778	0.840872	0.998981	13.0605	13.2676	5.69881	17.3253
stu-novel-miR-253	14.7302	-0.106165	0.203456	-0.52181	0.601803	0.998981	15.4352	18.5746	8.54822	16.3628
stu-novel-miR-254	42.4295	0.0275747	0.23759	0.11606	0.907605	0.998981	33.245	49.5323	48.4399	38.5006
stu-novel-miR-255	33.0532	-0.0313446	0.233354	-0.134322	0.893148	0.998981	37.9943	30.0732	25.6446	38.5006
stu-novel-miR-256	31.5516	-0.131432	0.232074	-0.566338	0.571164	0.998981	30.8703	39.8028	21.8454	33.688
stu-novel-miR-257	168.034	-0.0769789	0.226902	-0.33926	0.734414	0.998981	185.222	164.518	147.219	175.178
stu-novel-miR-258	80.2584	0.00980481	0.238016	0.0411939	0.967141	0.998981	73.6139	85.7971	77.8837	83.7388
stu-novel-miR-259	33.3884	-0.129244	0.235021	-0.549925	0.582371	0.998981	37.9943	36.2648	28.4941	30.8005
stu-novel-miR-26	1275.17	0.281731	0.212344	1.32677	0.184586	0.998981	1097.08	1115.36	1745.74	1142.51
stu-novel-miR-260	13.2671	0.0771822	0.197939	0.389929	0.696589	0.998981	15.4352	7.96055	12.3474	17.3253
stu-novel-miR-261	85.4451	-0.0821126	0.237367	-0.345931	0.729394	0.998981	81.9252	97.2957	79.7834	82.7763
stu-novel-miR-262	20.042	-0.116267	0.214785	-0.541319	0.588288	0.998981	20.1845	25.6507	23.745	10.5877
stu-novel-miR-263	49.7029	-0.0114056	0.23967	-0.0475886	0.962044	0.998981	53.4294	46.8788	47.4901	51.0133
stu-novel-miR-264	9.36988	0.0109922	0.182816	0.060127	0.952054	0.998981	9.49857	8.84506	8.54822	10.5877
stu-novel-miR-265	7.20522	0.076036	0.161524	0.470742	0.637825	0.998981	7.12393	4.42253	3.79921	13.4752
stu-novel-miR-266	65.134	0.0117418	0.239152	0.0490978	0.960841	0.998981	51.0548	77.8365	88.3316	43.3132
stu-novel-miR-267	82.2747	-0.152854	0.237682	-0.643104	0.520157	0.998981	91.4237	88.4506	69.3355	79.8887
stu-novel-miR-268	718.712	0.171318	0.225809	0.758686	0.44804	0.998981	740.888	569.622	556.584	1007.75
stu-novel-miR-269	106.085	0.0787641	0.234654	0.335661	0.737126	0.998981	104.484	98.1802	121.575	100.102
stu-novel-miR-27	6.43479	-0.0126917	0.162067	-0.0783115	0.93758	0.998981	7.12393	6.19154	6.64861	5.77509
stu-novel-miR-270	24.4454	0.148225	0.226487	0.654455	0.512819	0.998981	20.1845	21.2281	31.3435	25.0254
stu-novel-miR-271	2120.83	0.193254	0.210699	0.917203	0.359036	0.998981	2141.93	1716.83	1894.85	2729.69
stu-novel-miR-272	449.439	0.0866596	0.207639	0.417357	0.676417	0.998981	432.185	430.754	487.248	447.569
stu-novel-miR-273	12.3648	0.0273475	0.196728	0.139012	0.889441	0.998981	13.0605	10.6141	15.1968	10.5877
stu-novel-miR-274	11.3719	0.0302958	0.192944	0.157018	0.87523	0.998981	11.8732	9.72957	13.2972	10.5877
stu-novel-miR-275	22.5583	-0.0436824	0.219535	-0.198977	0.842281	0.998981	18.9971	28.3042	28.4941	14.4377
stu-novel-miR-276	842.053	0.347857	0.203957	1.70554	0.0880943	0.998981	784.819	635.96	986.844	960.59
stu-novel-miR-277	842.053	0.347857	0.203957	1.70554	0.0880943	0.998981	784.819	635.96	986.844	960.59
stu-novel-miR-278	2631.73	0.324712	0.205658	1.57889	0.11436	0.998981	2432.82	2054.71	3481.97	2557.4
stu-novel-miR-279	2631.73	0.324712	0.205658	1.57889	0.11436	0.998981	2432.82	2054.71	3481.97	2557.4
stu-novel-miR-28	17.6207	-0.00217669	0.207082	-0.0105113	0.991613	0.998981	9.49857	25.6507	20.8956	14.4377
stu-novel-miR-280	8.15458	0.2445	0.166014	1.47277	0.140812	0.998981	5.93661	0.884506	14.247	11.5502
stu-novel-miR-281	45.5113	0.161446	0.238315	0.677448	0.498122	0.998981	41.5562	38.0338	39.8917	62.5635
stu-novel-miR-282	16.9801	-0.162199	0.211331	-0.767509	0.442779	0.998981	18.9971	22.1127	10.4478	16.3628
stu-novel-miR-283	120.751	0.0626206	0.235038	0.266428	0.78991	0.998981	118.732	114.101	150.069	100.102
stu-novel-miR-284	26.2022	-0.1086	0.228795	-0.474659	0.63503	0.998981	26.1211	31.8422	23.745	23.1004
stu-novel-miR-285	168.034	-0.0769789	0.226902	-0.33926	0.734414	0.998981	185.222	164.518	147.219	175.178
stu-novel-miR-286	154.67	-0.126865	0.228434	-0.555371	0.578641	0.998981	163.85	166.287	159.567	128.977
stu-novel-miR-287	27.4888	-0.209964	0.230413	-0.91125	0.362164	0.998981	33.245	32.7267	21.8454	22.1378
stu-novel-miR-288	11.4928	-0.2254	0.192616	-1.17021	0.241918	0.998981	13.0605	18.5746	7.59841	6.7376
stu-novel-miR-289	11.3719	0.0302958	0.192944	0.157018	0.87523	0.998981	11.8732	9.72957	13.2972	10.5877
stu-novel-miR-29	40.3986	0.111238	0.238029	0.467329	0.640265	0.998981	35.6196	38.0338	45.5905	42.3507
stu-novel-miR-290	26.6044	0.0846639	0.224517	0.377093	0.706104	0.998981	15.4352	32.7267	34.1929	24.0629
stu-novel-miR-291	103.911	-0.185873	0.235683	-0.788656	0.430313	0.998981	100.922	129.138	85.4822	100.102
stu-novel-miR-292	6283.95	0.185097	0.219149	0.844617	0.398325	0.998981	6531.45	4893.97	5082.39	8627.98
stu-novel-miR-293	8.00006	0.137033	0.169525	0.808333	0.418899	0.998981	8.31125	2.65352	10.4478	10.5877
stu-novel-miR-294	61.2469	-0.144834	0.239818	-0.603936	0.545886	0.998981	72.4266	62.7999	69.3355	40.4256
stu-novel-miR-295	44.1923	0.143456	0.238418	0.601697	0.547376	0.998981	33.245	45.1098	54.1387	44.2757
stu-novel-miR-296	24.4454	0.148225	0.226487	0.654455	0.512819	0.998981	20.1845	21.2281	31.3435	25.0254
stu-novel-miR-297	20.6576	-0.246681	0.219883	-1.12187	0.261917	0.998981	30.8703	22.1127	14.247	15.4002
stu-novel-miR-298	36.0923	0.0529029	0.235594	0.224551	0.822329	0.998981	34.4323	34.4957	44.6407	30.8005
stu-novel-miR-299	28.0124	0.00366783	0.223626	0.0164016	0.986914	0.998981	16.6225	38.9183	20.8956	35.6131
stu-novel-miR-3	168.034	-0.0769789	0.226902	-0.33926	0.734414	0.998981	185.222	164.518	147.219	175.178
stu-novel-miR-30	102.401	0.0235215	0.234597	0.100263	0.920135	0.998981	102.11	99.9492	98.7794	108.764
stu-novel-miR-300	9.28183	0.0107786	0.177567	0.0607019	0.951597	0.998981	4.74928	13.2676	10.4478	8.66263
stu-novel-miR-301	10.0055	-0.144864	0.180798	-0.801245	0.42299	0.998981	7.12393	18.5746	8.54822	5.77509
stu-novel-miR-302	190.441	-0.265009	0.239644	-1.10584	0.268794	0.998981	244.588	202.552	80.7332	233.891
stu-novel-miR-303	7.98779	0.00940905	0.173378	0.0542689	0.956721	0.998981	9.49857	6.19154	7.59841	8.66263
stu-novel-miR-304	78.893	0.178208	0.239753	0.743298	0.457301	0.998981	66.49	72.5295	113.026	63.526
stu-novel-miR-305	19.9969	-0.0150351	0.216104	-0.0695736	0.944533	0.998981	24.9337	15.9211	24.6948	14.4377
stu-novel-miR-306	27.8962	-0.122317	0.227226	-0.538306	0.590366	0.998981	30.8703	31.8422	16.1466	32.7255
stu-novel-miR-307	6.90053	0.011317	0.160754	0.0703994	0.943876	0.998981	3.56196	9.72957	9.49802	4.81257
stu-novel-miR-308	53.6756	0.21208	0.239887	0.884083	0.376651	0.998981	46.3055	45.1098	65.5363	57.7509
stu-novel-miR-309	29.4614	0.164003	0.231925	0.707137	0.479481	0.998981	26.1211	23.8817	37.0423	30.8005
stu-novel-miR-31	21.5828	0.0172364	0.221601	0.0777815	0.938002	0.998981	20.1845	22.1127	18.0462	25.9879
stu-novel-miR-310	32.097	-0.0642531	0.232563	-0.276282	0.782331	0.998981	37.9943	30.0732	23.745	36.5756
stu-novel-miR-311	37.4832	-0.0693314	0.235331	-0.294612	0.76829	0.998981	29.683	49.5323	37.9921	32.7255
stu-novel-miR-32	249.099	0.0948295	0.227227	0.417333	0.676435	0.998981	211.343	261.814	315.334	207.903
stu-novel-miR-33	13.1214	-0.0825758	0.199043	-0.414865	0.678241	0.998981	11.8732	17.6901	13.2972	9.62515
stu-novel-miR-34	10.7306	-0.219141	0.182649	-1.19979	0.230219	0.998981	11.8732	18.5746	2.84941	9.62515
stu-novel-miR-35	14.4967	-0.0979404	0.202618	-0.483375	0.62883	0.998981	11.8732	21.2281	10.4478	14.4377
stu-novel-miR-36	16.0072	-0.234376	0.209412	-1.11921	0.26305	0.998981	22.5591	19.4591	9.49802	12.5127
stu-novel-miR-37	59.0947	0.209302	0.239872	0.872556	0.382905	0.998981	40.3689	60.1464	60.7873	75.0762
stu-novel-miR-38	10126.2	-0.121189	0.199654	-0.606995	0.543854	0.998981	11074.1	10271.8	8261.38	10897.6
stu-novel-miR-39	72.3162	-0.115545	0.238984	-0.483486	0.628751	0.998981	81.9252	73.414	61.7371	72.1886
stu-novel-miR-4	1.63904	0.0464484	0.0891924	0.520766	0.60253	0.998981	0	1.76901	1.8996	2.88754
stu-novel-miR-40	533.287	0.340709	0.222601	1.53058	0.125874	0.998981	384.692	499.746	766.49	482.22
stu-novel-miR-41	49.9802	-0.0322937	0.239696	-0.134727	0.892827	0.998981	54.6168	47.7633	47.4901	50.0508
stu-novel-miR-42	28.0837	0.0924922	0.230802	0.400742	0.68861	0.998981	23.7464	27.4197	32.2933	28.8754
stu-novel-miR-43	101.302	-0.0209828	0.236194	-0.0888374	0.929211	0.998981	118.732	86.6816	102.579	97.214
stu-novel-miR-44	6.43479	-0.0126917	0.162067	-0.0783115	0.93758	0.998981	7.12393	6.19154	6.64861	5.77509
stu-novel-miR-45	18.8554	-0.126462	0.21388	-0.591274	0.554337	0.998981	26.1211	17.6901	11.3976	20.2128
stu-novel-miR-46	43.5756	-0.232995	0.238682	-0.976171	0.32898	0.998981	48.6802	53.9549	38.9419	32.7255
stu-novel-miR-47	28.1203	0.0356798	0.228972	0.155826	0.87617	0.998981	21.3718	32.7267	24.6948	33.688
stu-novel-miR-48	57.8495	0.0465267	0.239912	0.193933	0.846229	0.998981	49.8675	61.9154	52.2391	67.376
stu-novel-miR-49	32.5279	0.133592	0.214352	0.623236	0.533129	0.998981	47.4928	7.07605	37.0423	38.5006
stu-novel-miR-5	13.9054	0.0419567	0.202101	0.207602	0.835539	0.998981	11.8732	14.1521	18.0462	11.5502
stu-novel-miR-50	32.5279	0.133592	0.214352	0.623236	0.533129	0.998981	47.4928	7.07605	37.0423	38.5006
stu-novel-miR-51	10.0814	0.0253929	0.182463	0.139167	0.889318	0.998981	13.0605	6.19154	7.59841	13.4752
stu-novel-miR-52	29788.3	0.105461	0.191084	0.551912	0.581009	0.998981	30370.5	26494.5	30983.5	31304.8
stu-novel-miR-53	29831.2	0.105055	0.191101	0.549735	0.582501	0.998981	30426.3	26530.8	31027.2	31340.4
stu-novel-miR-54	355.872	0.0458975	0.199788	0.229731	0.818301	0.998981	522.421	138.867	439.758	322.442
stu-novel-miR-55	5.00011	0.0371401	0.13582	0.273451	0.784507	0.998981	5.93661	2.65352	10.4478	0.962515
stu-novel-miR-56	10.9695	0.0025523	0.19036	0.0134077	0.989303	0.998981	13.0605	8.84506	12.3474	9.62515
stu-novel-miR-57	16.7685	-0.0238524	0.210867	-0.113116	0.909939	0.998981	17.8098	16.8056	19.9458	12.5127
stu-novel-miR-58	25.2148	-0.0326602	0.227071	-0.143833	0.885633	0.998981	23.7464	28.3042	20.8956	27.9129
stu-novel-miR-59	12.7245	-0.0152741	0.198919	-0.0767856	0.938794	0.998981	11.8732	14.1521	11.3976	13.4752
stu-novel-miR-6	241.806	-0.213275	0.21825	-0.977204	0.328468	0.998981	273.084	260.929	209.906	223.303
stu-novel-miR-60	40.5046	0.148195	0.237492	0.624002	0.532627	0.998981	33.245	38.0338	52.2391	38.5006
stu-novel-miR-61	29.2647	-0.0376594	0.23182	-0.162451	0.870951	0.998981	33.245	27.4197	29.4439	26.9504
stu-novel-miR-62	43.7634	-0.0762637	0.236392	-0.322616	0.746986	0.998981	30.8703	61.9154	37.9921	44.2757
stu-novel-miR-63	30.769	0.0913295	0.232118	0.393462	0.693978	0.998981	22.5591	33.6112	35.1427	31.763
stu-novel-miR-64	30.769	0.0913295	0.232118	0.393462	0.693978	0.998981	22.5591	33.6112	35.1427	31.763
stu-novel-miR-65	94.3939	-0.00358191	0.237272	-0.0150962	0.987955	0.998981	104.484	84.9126	107.328	80.8512
stu-novel-miR-66	20.3669	0.0638628	0.218058	0.29287	0.769621	0.998981	15.4352	22.1127	26.5945	17.3253
stu-novel-miR-67	22.1028	-0.0183589	0.218595	-0.0839855	0.933068	0.998981	28.4957	16.8056	15.1968	27.9129
stu-novel-miR-68	994.488	0.0360828	0.198084	0.182159	0.855458	0.998981	962.917	994.185	1039.08	981.765
stu-novel-miR-69	484.502	0.25581	0.213314	1.19922	0.230444	0.998981	433.372	418.371	462.553	623.71
stu-novel-miR-7	16.7409	0.000984919	0.209216	0.00470767	0.996244	0.998981	16.6225	16.8056	11.3976	22.1378
stu-novel-miR-70	66.7737	0.0423348	0.239807	0.176537	0.859872	0.998981	53.4294	76.0675	75.0343	62.5635
stu-novel-miR-71	517.19	-0.234613	0.21836	-1.07443	0.282629	0.998981	530.733	621.808	366.623	549.596
stu-novel-miR-72	148.887	0.0347127	0.228624	0.151833	0.879319	0.998981	147.228	145.059	138.671	164.59
stu-novel-miR-73	319.686	-0.440793	0.226769	-1.9438	0.0519199	0.998981	322.951	460.828	198.509	296.455
stu-novel-miR-74	12.2392	0.057937	0.197258	0.293712	0.768978	0.998981	10.6859	11.4986	13.2972	13.4752
stu-novel-miR-75	20.4311	-0.0837867	0.21404	-0.391452	0.695463	0.998981	28.4957	16.8056	11.3976	25.0254
stu-novel-miR-76	41.3623	-0.154538	0.237653	-0.650269	0.515519	0.998981	41.5562	51.3014	41.7913	30.8005
stu-novel-miR-77	44.5478	-0.0289206	0.238887	-0.121064	0.90364	0.998981	48.6802	42.4563	39.8917	47.1632
stu-novel-miR-78	19.0959	0.0850334	0.217962	0.390129	0.696441	0.998981	16.6225	17.6901	20.8956	21.1753
stu-novel-miR-79	19.0959	0.0850334	0.217962	0.390129	0.696441	0.998981	16.6225	17.6901	20.8956	21.1753
stu-novel-miR-8	30.7639	-0.0184611	0.231332	-0.0798037	0.936393	0.998981	37.9943	24.7662	25.6446	34.6505
stu-novel-miR-80	49.5671	-0.0246934	0.23934	-0.103173	0.917826	0.998981	45.1182	55.7239	56.0383	41.3881
stu-novel-miR-81	72.9985	0.0232812	0.238841	0.0974755	0.922349	0.998981	67.6773	76.0675	70.2853	77.9637
stu-novel-miR-82	17.1927	0.110075	0.213342	0.515953	0.605887	0.998981	15.4352	14.1521	20.8956	18.2878
stu-novel-miR-83	17.2195	-0.0623952	0.212249	-0.293972	0.76878	0.998981	21.3718	15.9211	13.2972	18.2878
stu-novel-miR-84	36.8349	-0.0626863	0.235675	-0.265986	0.79025	0.998981	33.245	44.2253	29.4439	40.4256
stu-novel-miR-85	319.686	-0.440793	0.226769	-1.9438	0.0519199	0.998981	322.951	460.828	198.509	296.455
stu-novel-miR-86	319.686	-0.440793	0.226769	-1.9438	0.0519199	0.998981	322.951	460.828	198.509	296.455
stu-novel-miR-87	14.2168	0.0918088	0.197726	0.464324	0.642416	0.998981	11.8732	12.3831	8.54822	24.0629
stu-novel-miR-88	20.4217	-0.237466	0.218379	-1.0874	0.27686	0.998981	20.1845	31.8422	13.2972	16.3628
stu-novel-miR-89	427.364	-0.0483717	0.228888	-0.211333	0.832627	0.998981	349.072	527.166	311.535	521.683
stu-novel-miR-9	123.567	-0.394715	0.232169	-1.70012	0.0891088	0.998981	136.542	163.634	96.8798	97.214
stu-novel-miR-90	50.5061	-0.0045504	0.239248	-0.0190196	0.984825	0.998981	58.1787	43.3408	41.7913	58.7134
stu-novel-miR-91	22.4339	-0.0695972	0.218769	-0.318131	0.750386	0.998981	23.7464	24.7662	12.3474	28.8754
stu-novel-miR-92	55.4851	-0.313366	0.239919	-1.30613	0.191507	0.998981	71.2393	63.6844	42.7411	44.2757
stu-novel-miR-93	783.701	-0.312705	0.218786	-1.42927	0.152926	0.998981	927.298	879.199	500.546	827.763
stu-novel-miR-94	783.701	-0.312705	0.218786	-1.42927	0.152926	0.998981	927.298	879.199	500.546	827.763
stu-novel-miR-95	15.824	0.117088	0.18579	0.630217	0.528553	0.998981	21.3718	3.53802	8.54822	29.838
stu-novel-miR-96	58.8222	0.0476079	0.239908	0.198443	0.842699	0.998981	61.7407	52.1859	65.5363	55.8259
stu-novel-miR-97	9.33997	0.0899346	0.182328	0.493256	0.621832	0.998981	8.31125	7.07605	12.3474	9.62515
stu-novel-miR-98	11.9154	0.0277782	0.190405	0.14589	0.884008	0.998981	16.6225	6.19154	13.2972	11.5502
stu-novel-miR-99	12.2392	0.057937	0.197258	0.293712	0.768978	0.998981	10.6859	11.4986	13.2972	13.4752

## Sheet: LD10 vs SD10
Table S3. DE analysis- novel miRNAs. LD10 vs SD10. Differentially expressed miRNAs highlighted in red.
Gene	baseMean	log2FoldChange	lfcSE	stat	pvalue	padj	SO_5642_LD10A_R1_novel.count	SO_5642_LD10B_R1_novel.count	SO_5642_SD10A_R1_novel.count	SO_5642_SD10B_R1_novel.count
stu-novel-miR-206	18.4117	1.34467	0.351182	3.82898	0.000128676	0.0289165	1.86574	1.86963	49.1524	20.7592
stu-novel-miR-139	109.405	1.34269	0.35926	3.73737	0.000185958	0.0289165	27.0532	29.9142	44.1369	336.517
stu-novel-miR-266	112.26	1.14869	0.353129	3.2529	0.00114235	0.118423	32.6504	58.8935	83.2582	274.24
stu-novel-miR-147	543.24	0.836885	0.308337	2.71419	0.00664371	0.516549	363.819	325.316	929.883	553.943
stu-novel-miR-268	735.845	0.697854	0.290849	2.39937	0.0164233	0.987271	565.318	471.148	976.026	930.886
stu-novel-miR-201	34.076	0.742627	0.358524	2.07135	0.0383264	0.987271	25.1875	12.1526	54.168	44.7961
stu-novel-miR-211	37.0549	-0.697531	0.359291	-1.94141	0.0522086	0.987271	59.7036	47.6757	32.0995	8.74071
stu-novel-miR-40	721.306	0.544862	0.303408	1.79581	0.0725251	0.987271	435.65	659.046	786.439	1004.09
stu-novel-miR-69	628.795	0.538211	0.301961	1.78239	0.0746863	0.987271	423.522	535.65	916.843	639.164
stu-novel-miR-280	22.6443	0.589139	0.354207	1.66326	0.0962602	0.987271	17.7245	6.54372	16.0498	50.2591
stu-novel-miR-160	27.7413	0.597062	0.359344	1.66153	0.0966065	0.987271	14.9259	18.6963	27.084	50.2591
stu-novel-miR-175	27.7413	0.597062	0.359344	1.66153	0.0966065	0.987271	14.9259	18.6963	27.084	50.2591
stu-novel-miR-46	51.1633	-0.576281	0.352078	-1.6368	0.101673	0.987271	77.4281	57.9587	44.1369	25.1295
stu-novel-miR-271	2606.74	0.477667	0.294873	1.61991	0.105253	0.987271	1859.21	2271.61	2576.99	3719.17
stu-novel-miR-49	53.2556	0.563338	0.357494	1.57579	0.115073	0.987271	45.7106	24.3052	38.1182	104.889
stu-novel-miR-50	53.2556	0.563338	0.357494	1.57579	0.115073	0.987271	45.7106	24.3052	38.1182	104.889
stu-novel-miR-278	2537.52	0.467886	0.324126	1.44353	0.14887	0.987271	2005.67	1938.81	4461.84	1743.77
stu-novel-miR-279	2537.52	0.467886	0.324126	1.44353	0.14887	0.987271	2005.67	1938.81	4461.84	1743.77
stu-novel-miR-145	16.3383	-0.503351	0.350608	-1.43565	0.151101	0.987271	33.5833	13.0874	11.0342	7.64812
stu-novel-miR-1	22.9044	0.504941	0.356152	1.41777	0.156259	0.987271	6.53008	21.5008	22.0684	41.5184
stu-novel-miR-176	185.805	-0.472593	0.335107	-1.41028	0.158458	0.987271	167.916	291.663	188.585	95.0552
stu-novel-miR-138	56.1817	-0.491456	0.359171	-1.36831	0.171215	0.987271	60.6365	87.8728	64.1991	12.0185
stu-novel-miR-226	24.6214	0.478864	0.357543	1.33932	0.180467	0.987271	10.2616	21.5008	48.1493	18.574
stu-novel-miR-235	468.586	-0.393407	0.294628	-1.33527	0.181789	0.987271	575.58	522.563	411.275	364.925
stu-novel-miR-37	48.1543	0.468876	0.351589	1.33359	0.182338	0.987271	41.9791	28.9793	69.2146	52.4443
stu-novel-miR-8	31.0577	-0.471194	0.357956	-1.31635	0.188058	0.987271	40.1134	40.1971	22.0684	21.8518
stu-novel-miR-142	6.4085	-0.377905	0.29123	-1.29761	0.19442	0.987271	17.7245	2.80445	4.01244	1.09259
stu-novel-miR-9	142.145	-0.409454	0.319227	-1.28264	0.199617	0.987271	186.574	152.375	120.373	109.259
stu-novel-miR-177	13.6252	0.436242	0.342115	1.27513	0.202263	0.987271	13.0602	2.80445	20.0622	18.574
stu-novel-miR-247	25.7825	-0.456646	0.358965	-1.27212	0.203332	0.987271	44.7777	23.3704	12.0373	22.9444
stu-novel-miR-242	133.889	0.420472	0.332467	1.2647	0.205978	0.987271	74.6295	137.418	182.566	140.944
stu-novel-miR-241	12.3038	-0.43337	0.344719	-1.25717	0.208693	0.987271	20.5231	14.0223	7.02177	7.64812
stu-novel-miR-89	666.112	0.398632	0.330244	1.20708	0.2274	0.987271	416.992	654.372	464.44	1128.64
stu-novel-miR-34	8.69685	-0.381735	0.323567	-1.17977	0.238092	0.987271	8.39582	16.8267	3.00933	6.55553
stu-novel-miR-10	368.285	-0.397907	0.34069	-1.16794	0.242829	0.987271	278.928	609.501	169.526	415.184
stu-novel-miR-73	368.285	-0.397907	0.34069	-1.16794	0.242829	0.987271	278.928	609.501	169.526	415.184
stu-novel-miR-85	368.285	-0.397907	0.34069	-1.16794	0.242829	0.987271	278.928	609.501	169.526	415.184
stu-novel-miR-86	368.285	-0.397907	0.34069	-1.16794	0.242829	0.987271	278.928	609.501	169.526	415.184
stu-novel-miR-62	38.1578	-0.397813	0.355156	-1.12011	0.262668	0.987271	51.3078	43.0016	32.0995	26.2221
stu-novel-miR-119	31.1696	0.396876	0.358261	1.10778	0.267955	0.987271	24.2546	22.4356	32.0995	45.8887
stu-novel-miR-110	24.7144	0.394316	0.357176	1.10398	0.269601	0.987271	15.8588	18.6963	14.0435	50.2591
stu-novel-miR-98	24.7144	0.394316	0.357176	1.10398	0.269601	0.987271	15.8588	18.6963	14.0435	50.2591
stu-novel-miR-95	18.1931	0.392358	0.356112	1.10178	0.270556	0.987271	11.1944	14.0223	18.056	29.4999
stu-novel-miR-276	725.399	0.329385	0.301119	1.09387	0.274013	0.987271	687.524	550.607	986.058	677.405
stu-novel-miR-277	725.399	0.329385	0.301119	1.09387	0.274013	0.987271	687.524	550.607	986.058	677.405
stu-novel-miR-223	20.6857	-0.39106	0.35831	-1.0914	0.275096	0.987271	28.9189	24.3052	12.0373	17.4814
stu-novel-miR-225	46.1449	-0.390489	0.35918	-1.08717	0.276963	0.987271	61.5693	56.089	58.1804	8.74071
stu-novel-miR-133	62.4424	0.379287	0.354483	1.06997	0.284631	0.987271	71.8309	25.2401	64.1991	88.4997
stu-novel-miR-200	262.591	0.323024	0.307044	1.05205	0.292779	0.987271	202.433	245.857	268.834	333.24
stu-novel-miR-298	56.4789	0.352461	0.345565	1.01996	0.307749	0.987271	42.912	48.6105	61.1897	73.2035
stu-novel-miR-156	5.05734	-0.287256	0.288594	-0.995363	0.31956	0.987271	5.59721	9.34817	2.00622	3.27777
stu-novel-miR-4	5.05734	-0.287256	0.288594	-0.995363	0.31956	0.987271	5.59721	9.34817	2.00622	3.27777
stu-novel-miR-136	36.9965	-0.350084	0.35616	-0.98294	0.325637	0.987271	37.3148	52.3498	32.0995	26.2221
stu-novel-miR-2	22.3716	0.346427	0.358826	0.965447	0.334321	0.987271	16.7916	16.8267	35.1089	20.7592
stu-novel-miR-270	22.3716	0.346427	0.358826	0.965447	0.334321	0.987271	16.7916	16.8267	35.1089	20.7592
stu-novel-miR-296	22.3716	0.346427	0.358826	0.965447	0.334321	0.987271	16.7916	16.8267	35.1089	20.7592
stu-novel-miR-78	19.2352	0.337308	0.349507	0.965097	0.334496	0.987271	17.7245	9.34817	41.1275	8.74071
stu-novel-miR-79	19.2352	0.337308	0.349507	0.965097	0.334496	0.987271	17.7245	9.34817	41.1275	8.74071
stu-novel-miR-293	6.33223	0.293854	0.307396	0.955948	0.339099	0.987271	3.73148	3.73927	8.02488	9.8333
stu-novel-miR-83	17.7668	-0.335479	0.356458	-0.941147	0.34663	0.987271	21.456	23.3704	12.0373	14.2037
stu-novel-miR-107	63.2866	-0.323695	0.344376	-0.939946	0.347245	0.987271	88.6225	59.8283	51.1586	53.5369
stu-novel-miR-261	75.9323	-0.320105	0.341418	-0.937574	0.348463	0.987271	97.0184	80.3943	78.2426	48.0739
stu-novel-miR-284	28.6546	-0.333232	0.359203	-0.927697	0.353565	0.987271	27.9861	42.0668	27.084	17.4814
stu-novel-miR-116	12.8516	0.305255	0.32915	0.927404	0.353717	0.987271	12.1273	4.67409	4.01244	30.5925
stu-novel-miR-232	80.4874	-0.314676	0.341862	-0.920476	0.357324	0.987271	96.0855	91.6121	87.2706	46.9813
stu-novel-miR-227	55.0499	0.323826	0.352023	0.9199	0.357625	0.987271	40.1134	49.5453	43.1337	87.4071
stu-novel-miR-5	18.1375	-0.325159	0.355444	-0.914799	0.360297	0.987271	25.1875	20.566	18.056	8.74071
stu-novel-miR-126	710.206	0.266019	0.290829	0.91469	0.360354	0.987271	580.244	675.873	754.339	830.368
stu-novel-miR-172	710.206	0.266019	0.290829	0.91469	0.360354	0.987271	580.244	675.873	754.339	830.368
stu-novel-miR-233	710.206	0.266019	0.290829	0.91469	0.360354	0.987271	580.244	675.873	754.339	830.368
stu-novel-miR-245	11.8963	-0.309583	0.344247	-0.899303	0.368491	0.987271	13.993	16.8267	8.02488	8.74071
stu-novel-miR-217	121.429	-0.300293	0.336671	-0.89195	0.37242	0.987271	188.439	91.6121	107.333	98.333
stu-novel-miR-35	13.6265	0.309631	0.348244	0.88912	0.373939	0.987271	8.39582	11.2178	13.0404	21.8518
stu-novel-miR-185	23.9995	-0.317394	0.359009	-0.884084	0.376651	0.987271	29.8518	28.9793	12.0373	25.1295
stu-novel-miR-114	408.618	-0.261558	0.295935	-0.883838	0.376784	0.987271	470.166	441.234	382.185	340.888
stu-novel-miR-161	13.5722	0.296995	0.336612	0.882304	0.377612	0.987271	7.46295	11.2178	5.01555	30.5925
stu-novel-miR-249	66.5706	-0.297069	0.34258	-0.867153	0.385858	0.987271	69.9652	84.1335	65.2022	46.9813
stu-novel-miR-305	32.5957	0.310091	0.358255	0.865558	0.386732	0.987271	21.456	30.849	31.0964	46.9813
stu-novel-miR-231	78.3525	0.298714	0.352146	0.848269	0.396288	0.987271	76.4952	53.2846	48.1493	135.481
stu-novel-miR-189	46.4219	-0.296971	0.350173	-0.84807	0.396399	0.987271	54.1064	54.2194	39.1213	38.2406
stu-novel-miR-115	155.146	0.260725	0.314607	0.828731	0.407257	0.987271	137.132	135.548	178.554	169.351
stu-novel-miR-123	155.146	0.260725	0.314607	0.828731	0.407257	0.987271	137.132	135.548	178.554	169.351
stu-novel-miR-120	25.2188	-0.296237	0.359342	-0.824388	0.409719	0.987271	30.7847	29.9142	15.0467	25.1295
stu-novel-miR-183	26.072	-0.29263	0.359342	-0.814351	0.415444	0.987271	38.2476	24.3052	22.0684	19.6666
stu-novel-miR-248	46.0315	0.28062	0.350473	0.80069	0.423311	0.987271	36.3819	41.132	54.168	52.4443
stu-novel-miR-88	21.3205	0.286867	0.358502	0.800183	0.423605	0.987271	13.993	19.6312	21.0653	30.5925
stu-novel-miR-158	95.698	0.2646	0.337672	0.7836	0.433275	0.987271	66.2337	99.0906	85.2644	132.203
stu-novel-miR-47	32.5797	-0.278432	0.357918	-0.777922	0.436615	0.987271	42.912	33.6534	22.0684	31.6851
stu-novel-miR-25	96.5238	-0.255964	0.330675	-0.774066	0.438892	0.987271	103.548	114.048	95.2955	73.2035
stu-novel-miR-263	43.2275	-0.271071	0.352099	-0.769872	0.441376	0.987271	51.3078	48.6105	39.1213	33.8703
stu-novel-miR-144	20.4948	0.275545	0.358544	0.768513	0.442183	0.987271	15.8588	16.8267	23.0715	26.2221
stu-novel-miR-256	30.8749	-0.272452	0.358919	-0.759091	0.447798	0.987271	42.912	29.9142	32.0995	18.574
stu-novel-miR-239	119.354	-0.241147	0.328511	-0.734061	0.462912	0.987271	135.266	131.809	128.398	81.9442
stu-novel-miR-252	10.4328	-0.243906	0.338152	-0.721291	0.470731	0.987271	13.0602	13.0874	9.02799	6.55553
stu-novel-miR-129	74.5552	-0.258385	0.359336	-0.719063	0.472102	0.987271	116.609	58.8935	106.33	16.3888
stu-novel-miR-282	13.4872	-0.242991	0.340718	-0.713174	0.475738	0.987271	16.7916	16.8267	17.0529	3.27777
stu-novel-miR-103	21.7006	-0.252747	0.35889	-0.704246	0.481279	0.987271	28.9189	22.4356	19.0591	16.3888
stu-novel-miR-42	23.3145	-0.251383	0.358832	-0.70056	0.483578	0.987271	31.7175	23.3704	13.0404	25.1295
stu-novel-miR-58	19.0742	0.248732	0.356917	0.69689	0.485872	0.987271	14.9259	15.8919	29.0902	16.3888
stu-novel-miR-24	27.2394	-0.24693	0.359272	-0.687306	0.49189	0.987271	33.5833	29.9142	17.0529	28.4073
stu-novel-miR-212	20.0641	0.2454	0.357677	0.686095	0.492653	0.987271	17.7245	14.9571	30.0933	17.4814
stu-novel-miR-121	24.7062	-0.245685	0.359283	-0.68382	0.494089	0.987271	21.456	36.4579	19.0591	21.8518
stu-novel-miR-102	12.9082	-0.232353	0.341808	-0.679777	0.496646	0.987271	7.46295	24.3052	10.0311	9.8333
stu-novel-miR-220	445.19	-0.23154	0.340614	-0.679774	0.496647	0.987271	421.657	576.782	599.86	182.462
stu-novel-miR-152	110.968	-0.219986	0.324899	-0.677091	0.498349	0.987271	129.669	115.917	104.323	93.9626
stu-novel-miR-105	22.6012	-0.241532	0.358409	-0.673901	0.500374	0.987271	22.3889	30.849	12.0373	25.1295
stu-novel-miR-17	22.6012	-0.241532	0.358409	-0.673901	0.500374	0.987271	22.3889	30.849	12.0373	25.1295
stu-novel-miR-71	561.071	-0.206262	0.306949	-0.671975	0.501599	0.987271	518.675	708.591	406.26	610.757
stu-novel-miR-19	16.3973	0.228375	0.340529	0.670649	0.502444	0.987271	2.79861	22.4356	13.0404	27.3147
stu-novel-miR-117	110.735	-0.216067	0.324901	-0.665023	0.506036	0.987271	128.736	115.917	104.323	93.9626
stu-novel-miR-118	110.735	-0.216067	0.324901	-0.665023	0.506036	0.987271	128.736	115.917	104.323	93.9626
stu-novel-miR-262	13.9607	-0.227971	0.349184	-0.652867	0.513842	0.987271	18.6574	14.9571	8.02488	14.2037
stu-novel-miR-186	36.0358	-0.231769	0.356019	-0.651003	0.515044	0.987271	37.3148	44.8712	28.0871	33.8703
stu-novel-miR-187	36.0358	-0.231769	0.356019	-0.651003	0.515044	0.987271	37.3148	44.8712	28.0871	33.8703
stu-novel-miR-65	68.0334	-0.225478	0.348151	-0.647644	0.517215	0.987271	97.0184	56.089	74.2302	44.7961
stu-novel-miR-265	14.3114	0.220915	0.342131	0.645702	0.518472	0.987271	5.59721	16.8267	26.0809	8.74071
stu-novel-miR-125	12.027	-0.198774	0.308787	-0.643725	0.519753	0.987271	29.8518	0.934817	14.0435	3.27777
stu-novel-miR-171	24.1892	-0.228158	0.359344	-0.63493	0.525474	0.987271	30.7847	25.2401	21.0653	19.6666
stu-novel-miR-20	115.749	0.212514	0.335496	0.633433	0.526451	0.987271	106.347	100.025	87.2706	169.351
stu-novel-miR-56	19.8553	0.224852	0.356744	0.630288	0.528506	0.987271	13.993	18.6963	15.0467	31.6851
stu-novel-miR-254	59.9092	0.217611	0.34651	0.628008	0.529999	0.987271	49.442	56.089	52.1617	81.9442
stu-novel-miR-48	53.7676	-0.217461	0.347785	-0.625274	0.531791	0.987271	55.0393	65.4372	54.168	40.4258
stu-novel-miR-179	22.8323	-0.223324	0.358602	-0.622762	0.533441	0.987271	26.1203	27.1097	26.0809	12.0185
stu-novel-miR-165	47.8456	-0.215936	0.350746	-0.615649	0.538126	0.987271	61.5693	45.806	38.1182	45.8887
stu-novel-miR-291	108.433	-0.204016	0.333708	-0.611361	0.540961	0.987271	125.937	113.113	71.2208	123.463
stu-novel-miR-181	26.4722	-0.219075	0.359206	-0.609886	0.541938	0.987271	31.7175	28.9793	20.0622	25.1295
stu-novel-miR-106	36.9989	0.216188	0.355126	0.608764	0.542681	0.987271	31.7175	32.7186	43.1337	40.4258
stu-novel-miR-250	22.5798	0.214345	0.359153	0.596806	0.550637	0.987271	20.5231	17.7615	29.0902	22.9444
stu-novel-miR-72	163.369	0.188348	0.316943	0.594265	0.552335	0.987271	154.856	143.027	202.628	152.962
stu-novel-miR-198	254.783	-0.185996	0.313575	-0.593148	0.553082	0.987271	332.101	221.552	256.796	208.684
stu-novel-miR-207	1505.45	-0.174497	0.294297	-0.592928	0.553229	0.987271	1872.27	1369.51	1243.86	1536.18
stu-novel-miR-122	8.99121	0.195216	0.330158	0.591279	0.554333	0.987271	8.39582	5.6089	11.0342	10.9259
stu-novel-miR-112	26.5412	-0.211844	0.359328	-0.589554	0.55549	0.987271	27.9861	32.7186	17.0529	28.4073
stu-novel-miR-77	58.9749	-0.201409	0.344257	-0.585055	0.558511	0.987271	65.3008	65.4372	58.1804	46.9813
stu-novel-miR-251	12.9879	-0.201973	0.347183	-0.581748	0.560736	0.987271	15.8588	14.9571	8.02488	13.1111
stu-novel-miR-96	102.493	0.196905	0.338789	0.581201	0.561105	0.987271	94.2197	89.7425	75.2333	150.777
stu-novel-miR-297	21.0919	-0.206659	0.358663	-0.576193	0.564484	0.987271	23.3217	25.2401	15.0467	20.7592
stu-novel-miR-295	43.4755	0.203871	0.354004	0.5759	0.564683	0.987271	41.9791	34.5882	60.1866	37.148
stu-novel-miR-264	15.2104	0.202655	0.353166	0.573825	0.566086	0.987271	12.1273	13.0874	17.0529	18.574
stu-novel-miR-244	41.8405	0.198666	0.35453	0.560366	0.57523	0.987271	28.9189	44.8712	41.1275	52.4443
stu-novel-miR-307	12.2489	-0.191199	0.345058	-0.554106	0.579507	0.987271	13.0602	15.8919	8.02488	12.0185
stu-novel-miR-246	46.6347	0.193493	0.35002	0.552807	0.580396	0.987271	40.1134	43.0016	53.1649	50.2591
stu-novel-miR-234	40.0667	0.193714	0.353912	0.547351	0.584138	0.987271	33.5833	37.3927	40.1244	49.1665
stu-novel-miR-91	26.357	-0.196524	0.359289	-0.546979	0.584393	0.987271	27.9861	31.7838	27.084	18.574
stu-novel-miR-224	48.0749	0.193127	0.354875	0.544211	0.586296	0.987271	37.3148	47.6757	34.1058	73.2035
stu-novel-miR-39	88.1526	-0.178556	0.335775	-0.531773	0.594883	0.987271	80.2267	112.178	90.2799	69.9257
stu-novel-miR-74	8.25595	0.172363	0.324256	0.531565	0.595027	0.987271	8.39582	4.67409	9.02799	10.9259
stu-novel-miR-99	8.25595	0.172363	0.324256	0.531565	0.595027	0.987271	8.39582	4.67409	9.02799	10.9259
stu-novel-miR-15	14.5646	0.185263	0.34987	0.529518	0.596446	0.987271	12.1273	12.1526	11.0342	22.9444
stu-novel-miR-38	9143.43	-0.146801	0.27959	-0.525058	0.599543	0.987271	9447.16	9981.04	8518.41	8627.08
stu-novel-miR-7	16.6096	-0.185858	0.35487	-0.523734	0.600463	0.987271	22.3889	15.8919	15.0467	13.1111
stu-novel-miR-60	40.7815	-0.184939	0.354567	-0.521591	0.601955	0.987271	45.7106	44.8712	44.1369	28.4073
stu-novel-miR-255	29.7912	0.187115	0.358837	0.521448	0.602055	0.987271	32.6504	19.6312	34.1058	32.7777
stu-novel-miR-194	12.975	0.177782	0.343856	0.517026	0.605138	0.987271	15.8588	5.6089	14.0435	16.3888
stu-novel-miR-113	65.6714	-0.177602	0.343826	-0.516547	0.605472	0.987271	83.9582	59.8283	51.1586	67.7405
stu-novel-miR-221	216.724	0.159444	0.318648	0.500375	0.616811	0.987271	193.104	207.529	174.541	291.721
stu-novel-miR-236	993.412	0.145917	0.294367	0.495697	0.620108	0.987271	875.031	984.363	1223.79	890.46
stu-novel-miR-259	53.0191	0.174569	0.357537	0.488255	0.625369	0.987271	52.2407	42.0668	27.084	90.6849
stu-novel-miR-135	14.6273	0.160013	0.336806	0.475089	0.634723	0.987271	20.5231	3.73927	8.02488	26.2221
stu-novel-miR-173	26.464	-0.16645	0.359176	-0.463421	0.643063	0.987271	27.0532	31.7838	24.0747	22.9444
stu-novel-miR-174	26.464	-0.16645	0.359176	-0.463421	0.643063	0.987271	27.0532	31.7838	24.0747	22.9444
stu-novel-miR-146	39.8007	0.163517	0.354559	0.461183	0.644667	0.987271	39.1805	32.7186	50.1555	37.148
stu-novel-miR-258	98.0214	0.150571	0.332364	0.45303	0.650527	0.987271	86.7568	94.4165	85.2644	125.648
stu-novel-miR-23	58.2593	-0.157885	0.350333	-0.45067	0.652227	0.987271	83.0253	43.9364	60.1866	45.8887
stu-novel-miR-137	28.2541	0.161395	0.359163	0.449363	0.65317	0.987271	31.7175	18.6963	33.1026	29.4999
stu-novel-miR-310	28.2541	0.161395	0.359163	0.449363	0.65317	0.987271	31.7175	18.6963	33.1026	29.4999
stu-novel-miR-286	168.66	0.13872	0.31246	0.443959	0.657072	0.987271	162.319	153.31	176.547	182.462
stu-novel-miR-308	48.4981	0.156736	0.356099	0.440147	0.659831	0.987271	30.7847	57.0238	71.2208	34.9628
stu-novel-miR-75	22.6137	0.157559	0.359209	0.438627	0.660932	0.987271	18.6574	21.5008	24.0747	26.2221
stu-novel-miR-53	29490.8	0.12331	0.282642	0.436278	0.662635	0.987271	28404.9	27463.1	34183	27912.4
stu-novel-miR-52	29433.1	0.123231	0.282637	0.436005	0.662833	0.987271	28354.5	27406	34111.8	27859.9
stu-novel-miR-61	29.6691	0.155181	0.359082	0.43216	0.665625	0.987271	19.5902	33.6534	38.1182	27.3147
stu-novel-miR-134	225.951	0.13652	0.316191	0.431766	0.665911	0.987271	196.835	226.226	293.911	186.833
stu-novel-miR-290	26.1428	-0.154712	0.359349	-0.430535	0.666807	0.987271	23.3217	34.5882	28.0871	18.574
stu-novel-miR-32	257.525	-0.130588	0.303875	-0.429741	0.667384	0.987271	271.465	273.901	224.697	260.036
stu-novel-miR-219	29.2966	-0.153401	0.358787	-0.427556	0.668974	0.987271	31.7175	32.7186	21.0653	31.6851
stu-novel-miR-93	703.916	-0.124872	0.293165	-0.425944	0.670148	0.987271	708.047	776.833	587.823	742.96
stu-novel-miR-94	703.916	-0.124872	0.293165	-0.425944	0.670148	0.987271	708.047	776.833	587.823	742.96
stu-novel-miR-150	13.1887	-0.144475	0.348367	-0.414719	0.678347	0.987271	15.8588	14.0223	13.0404	9.8333
stu-novel-miR-36	13.1887	-0.144475	0.348367	-0.414719	0.678347	0.987271	15.8588	14.0223	13.0404	9.8333
stu-novel-miR-162	9.8755	0.137182	0.333744	0.411039	0.681044	0.987271	9.32869	7.47854	15.0467	7.64812
stu-novel-miR-229	9.8755	0.137182	0.333744	0.411039	0.681044	0.987271	9.32869	7.47854	15.0467	7.64812
stu-novel-miR-303	9.8755	0.137182	0.333744	0.411039	0.681044	0.987271	9.32869	7.47854	15.0467	7.64812
stu-novel-miR-237	67.3766	-0.140202	0.341094	-0.411037	0.681045	0.987271	70.898	73.8506	71.2208	53.5369
stu-novel-miR-154	172.838	-0.127389	0.311976	-0.408329	0.683032	0.987271	190.305	175.746	162.504	162.796
stu-novel-miR-191	256.035	0.126172	0.313516	0.402442	0.687358	0.987271	200.567	281.38	229.712	312.48
stu-novel-miR-192	256.035	0.126172	0.313516	0.402442	0.687358	0.987271	200.567	281.38	229.712	312.48
stu-novel-miR-257	193.581	0.123942	0.309716	0.400179	0.689024	0.987271	194.037	171.072	201.625	207.592
stu-novel-miR-285	193.581	0.123942	0.309716	0.400179	0.689024	0.987271	194.037	171.072	201.625	207.592
stu-novel-miR-3	193.581	0.123942	0.309716	0.400179	0.689024	0.987271	194.037	171.072	201.625	207.592
stu-novel-miR-66	19.8734	0.142968	0.358264	0.399058	0.68985	0.987271	18.6574	16.8267	21.0653	22.9444
stu-novel-miR-153	19.7658	-0.141653	0.357445	-0.396294	0.691888	0.987271	25.1875	18.6963	22.0684	13.1111
stu-novel-miR-199	386.448	0.117271	0.302097	0.388191	0.697875	0.987271	386.208	345.882	346.073	467.628
stu-novel-miR-97	7.22663	0.123053	0.31734	0.387762	0.698192	0.987271	5.59721	6.54372	8.02488	8.74071
stu-novel-miR-108	12.4263	-0.131214	0.34496	-0.380375	0.703667	0.987271	14.9259	13.0874	14.0435	7.64812
stu-novel-miR-292	7598.79	0.103533	0.282898	0.365973	0.714385	0.987271	6701.73	7821.62	7474.18	8397.64
stu-novel-miR-169	43.9915	-0.125852	0.351496	-0.358047	0.720308	0.987271	44.7777	49.5453	40.1244	41.5184
stu-novel-miR-13	18.1712	0.127426	0.356773	0.357164	0.720969	0.987271	14.9259	17.7615	17.0529	22.9444
stu-novel-miR-228	46.6908	-0.124203	0.350018	-0.354849	0.722703	0.987271	47.5763	52.3498	43.1337	43.7036
stu-novel-miR-267	144.951	0.119642	0.33841	0.353543	0.723681	0.987271	104.481	167.332	99.3079	208.684
stu-novel-miR-67	24.0524	-0.124932	0.359342	-0.347668	0.728089	0.987271	28.9189	23.3704	22.0684	21.8518
stu-novel-miR-311	24.4469	-0.124761	0.359301	-0.347234	0.728416	0.987271	29.8518	23.3704	27.084	17.4814
stu-novel-miR-215	20.9847	0.118579	0.358371	0.330884	0.740732	0.987271	22.3889	15.8919	27.084	18.574
stu-novel-miR-51	9.07459	0.104565	0.323986	0.322746	0.746888	0.987271	6.53008	9.34817	16.0498	4.37036
stu-novel-miR-111	68.3374	-0.110138	0.34272	-0.321365	0.747934	0.987271	66.2337	78.5246	77.2395	51.3517
stu-novel-miR-193	72.3689	0.108635	0.342067	0.317584	0.750801	0.987271	73.6966	62.6328	59.1835	93.9626
stu-novel-miR-104	10.4417	-0.103656	0.331952	-0.312263	0.75484	0.987271	8.39582	14.9571	14.0435	4.37036
stu-novel-miR-180	78.7709	0.10549	0.344641	0.306087	0.759539	0.987271	80.2267	68.2417	55.1711	111.444
stu-novel-miR-210	24.2376	0.109022	0.359349	0.303388	0.761594	0.987271	21.456	23.3704	28.0871	24.037
stu-novel-miR-80	65.0916	-0.103569	0.341911	-0.302912	0.761957	0.987271	68.0994	69.1765	53.1649	69.9257
stu-novel-miR-155	17.6589	-0.106051	0.356552	-0.297436	0.766133	0.987271	19.5902	18.6963	17.0529	15.2962
stu-novel-miR-45	26.6095	-0.105366	0.359205	-0.293331	0.769269	0.987271	27.9861	28.9793	21.0653	28.4073
stu-novel-miR-131	21.751	0.10501	0.358739	0.29272	0.769736	0.987271	15.8588	24.3052	26.0809	20.7592
stu-novel-miR-188	21.7267	0.105043	0.358912	0.29267	0.769774	0.987271	19.5902	20.566	27.084	19.6666
stu-novel-miR-22	32.0444	0.104812	0.358184	0.29262	0.769812	0.987271	35.449	24.3052	29.0902	39.3332
stu-novel-miR-68	975.126	-0.0864367	0.298523	-0.289547	0.772162	0.987271	1167.02	858.162	803.491	1071.83
stu-novel-miR-300	10.3872	0.0972251	0.338125	0.287542	0.773697	0.987271	10.2616	8.41335	13.0404	9.8333
stu-novel-miR-163	120.461	-0.0992899	0.345387	-0.287474	0.773749	0.987271	103.548	150.506	165.513	62.2776
stu-novel-miR-281	32.4889	0.102883	0.358572	0.286925	0.77417	0.987271	35.449	25.2401	44.1369	25.1295
stu-novel-miR-253	12.3477	-0.0978704	0.341983	-0.286185	0.774737	0.987271	17.7245	9.34817	7.02177	15.2962
stu-novel-miR-29	41.905	-0.100916	0.353172	-0.285741	0.775077	0.987271	42.912	45.806	34.1058	44.7961
stu-novel-miR-238	64.8579	-0.0970637	0.342008	-0.283806	0.776559	0.987271	68.0994	68.2417	53.1649	69.9257
stu-novel-miR-182	16.3916	-0.0982495	0.354195	-0.277388	0.781482	0.987271	14.9259	20.566	18.056	12.0185
stu-novel-miR-209	67.7845	0.093903	0.341984	0.274583	0.783637	0.987271	59.7036	69.1765	83.2582	58.9998
stu-novel-miR-130	13.8009	0.0955527	0.348517	0.274169	0.783955	0.987271	10.2616	14.9571	19.0591	10.9259
stu-novel-miR-33	13.3191	-0.0951693	0.347874	-0.273574	0.784412	0.987271	13.0602	15.8919	9.02799	15.2962
stu-novel-miR-178	19.1915	0.0966406	0.356364	0.271185	0.786249	0.987271	21.456	14.0223	27.084	14.2037
stu-novel-miR-190	4.89966	-0.07419	0.274582	-0.270192	0.787012	0.987271	0.932869	10.283	4.01244	4.37036
stu-novel-miR-205	4.89966	-0.07419	0.274582	-0.270192	0.787012	0.987271	0.932869	10.283	4.01244	4.37036
stu-novel-miR-168	841.099	0.0775825	0.291709	0.265959	0.790271	0.987271	722.04	903.033	821.547	917.775
stu-novel-miR-6	283.953	0.0851968	0.333669	0.255333	0.798466	0.987271	352.624	190.703	192.597	399.888
stu-novel-miR-128	7.99357	-0.0768046	0.309783	-0.24793	0.804189	0.987271	4.66434	13.0874	12.0373	2.18518
stu-novel-miR-55	7.99357	-0.0768046	0.309783	-0.24793	0.804189	0.987271	4.66434	13.0874	12.0373	2.18518
stu-novel-miR-57	12.5348	-0.0853784	0.346335	-0.24652	0.80528	0.987271	11.1944	15.8919	11.0342	12.0185
stu-novel-miR-159	13.6615	0.0851651	0.349622	0.243592	0.807547	0.987271	11.1944	14.0223	13.0404	16.3888
stu-novel-miR-195	13.7471	0.0832389	0.343049	0.242644	0.808281	0.987271	18.6574	6.54372	9.02799	20.7592
stu-novel-miR-216	12.2285	0.0828265	0.341998	0.242184	0.808637	0.987271	14.9259	7.47854	9.02799	17.4814
stu-novel-miR-197	15.6919	-0.0814859	0.352146	-0.231398	0.817006	0.987271	22.3889	11.2178	16.0498	13.1111
stu-novel-miR-275	21.1179	-0.0828868	0.35865	-0.231108	0.817231	0.987271	18.6574	26.1749	21.0653	18.574
stu-novel-miR-213	11.2421	-0.0780155	0.341158	-0.228678	0.819119	0.987271	12.1273	12.1526	13.0404	7.64812
stu-novel-miR-214	11.2421	-0.0780155	0.341158	-0.228678	0.819119	0.987271	12.1273	12.1526	13.0404	7.64812
stu-novel-miR-274	11.6817	0.0772838	0.339241	0.227814	0.819791	0.987271	5.59721	15.8919	11.0342	14.2037
stu-novel-miR-289	11.6817	0.0772838	0.339241	0.227814	0.819791	0.987271	5.59721	15.8919	11.0342	14.2037
stu-novel-miR-218	13.9415	-0.0787097	0.349756	-0.225042	0.821947	0.987271	14.9259	14.9571	16.0498	9.8333
stu-novel-miR-166	509.157	-0.0696983	0.312136	-0.223295	0.823306	0.987271	609.163	442.169	614.907	370.388
stu-novel-miR-167	509.157	-0.0696983	0.312136	-0.223295	0.823306	0.987271	609.163	442.169	614.907	370.388
stu-novel-miR-309	30.6661	-0.0780715	0.358194	-0.217959	0.827461	0.987271	33.5833	30.849	33.1026	25.1295
stu-novel-miR-132	12.5583	0.0750998	0.345681	0.217252	0.828012	0.987271	11.1944	12.1526	17.0529	9.8333
stu-novel-miR-157	32.5303	-0.0763867	0.35748	-0.213681	0.830796	0.987271	37.3148	30.849	28.0871	33.8703
stu-novel-miR-100	22.1097	-0.0763901	0.358819	-0.212893	0.83141	0.987271	17.7245	28.9793	22.0684	19.6666
stu-novel-miR-196	1060.37	0.0616153	0.2911	0.211663	0.83237	0.987271	1052.28	1011.47	1234.83	942.904
stu-novel-miR-12	9.36582	0.0606774	0.29138	0.208242	0.83504	0.987271	15.8588	0.934817	1.00311	19.6666
stu-novel-miR-140	80.2802	-0.0720375	0.348993	-0.206415	0.836466	0.987271	80.2267	86.938	111.345	42.611
stu-novel-miR-28	16.429	0.0724311	0.353626	0.204824	0.837709	0.987271	12.1273	18.6963	13.0404	21.8518
stu-novel-miR-30	148.668	-0.0676991	0.331382	-0.204293	0.838124	0.987271	140.863	166.397	97.3017	190.11
stu-novel-miR-70	58.9211	-0.069258	0.345483	-0.200467	0.841115	0.987271	68.0994	54.2194	64.1991	49.1665
stu-novel-miR-287	29.4211	-0.0716514	0.358721	-0.199742	0.841683	0.987271	28.9189	32.7186	33.1026	22.9444
stu-novel-miR-124	97.5823	0.0664617	0.335696	0.197982	0.843059	0.987271	93.2869	95.3514	127.395	74.296
stu-novel-miR-170	34.6454	0.0692163	0.357901	0.193395	0.84665	0.987271	31.7175	34.5882	47.1462	25.1295
stu-novel-miR-11	8.95474	-0.05165	0.284265	-0.181697	0.855821	0.987271	19.5902	0	14.0435	2.18518
stu-novel-miR-63	32.5019	0.0601212	0.357768	0.168046	0.866547	0.987271	30.7847	31.7838	40.1244	27.3147
stu-novel-miR-64	32.5019	0.0601212	0.357768	0.168046	0.866547	0.987271	30.7847	31.7838	40.1244	27.3147
stu-novel-miR-76	41.9866	-0.0575463	0.353307	-0.162879	0.870614	0.987271	46.6434	40.1971	46.1431	34.9628
stu-novel-miR-269	127.386	0.0521245	0.320532	0.162619	0.870819	0.987271	123.139	125.266	122.379	138.759
stu-novel-miR-148	20.9466	-0.0571407	0.351669	-0.162484	0.870924	0.987271	18.6574	25.2401	6.01866	33.8703
stu-novel-miR-240	468.02	-0.0481112	0.300861	-0.159912	0.872951	0.987271	534.534	421.603	400.241	515.702
stu-novel-miR-127	19.0394	0.0558761	0.35725	0.156406	0.875713	0.987271	13.993	22.4356	20.0622	19.6666
stu-novel-miR-143	33.8638	-0.0555531	0.357352	-0.155458	0.876461	0.987271	33.5833	36.4579	26.0809	39.3332
stu-novel-miR-54	389.076	0.049284	0.318189	0.154889	0.876909	0.987271	487.89	272.032	332.03	464.35
stu-novel-miR-302	139.284	-0.0528498	0.350604	-0.150739	0.880181	0.987271	92.354	194.442	68.2115	202.129
stu-novel-miR-101	432.647	-0.0416485	0.306704	-0.135794	0.891984	0.987271	421.657	459.93	330.023	518.98
stu-novel-miR-109	432.647	-0.0416485	0.306704	-0.135794	0.891984	0.987271	421.657	459.93	330.023	518.98
stu-novel-miR-18	20.3057	0.0455012	0.358451	0.126938	0.898989	0.987271	20.5231	18.6963	19.0591	22.9444
stu-novel-miR-306	42.7336	0.044967	0.354488	0.126851	0.899059	0.987271	41.0462	42.0668	32.0995	55.722
stu-novel-miR-273	10.2455	-0.0421111	0.333927	-0.126109	0.899646	0.987271	12.1273	9.34817	14.0435	5.46294
stu-novel-miR-141	40.9383	-0.0445391	0.356725	-0.124856	0.900638	0.987271	41.9791	42.0668	25.0778	54.6294
stu-novel-miR-288	10.7614	0.0390718	0.333344	0.117212	0.906692	0.987271	8.39582	12.1526	5.01555	17.4814
stu-novel-miR-202	52.1551	-0.036939	0.347746	-0.106224	0.915404	0.987271	48.5092	57.9587	55.1711	46.9813
stu-novel-miR-92	46.5243	-0.0376392	0.35517	-0.105975	0.915602	0.987271	58.7707	36.4579	59.1835	31.6851
stu-novel-miR-260	20.698	0.0358889	0.356611	0.100639	0.919837	0.987271	16.7916	23.3704	12.0373	30.5925
stu-novel-miR-14	51.9684	0.035326	0.351028	0.100636	0.91984	0.987271	37.3148	64.5024	48.1493	57.9072
stu-novel-miR-304	63.6459	-0.0340889	0.348386	-0.097848	0.922053	0.987271	63.4351	66.372	83.2582	41.5184
stu-novel-miR-151	6.86541	0.0270345	0.280511	0.0963758	0.923222	0.987271	13.0602	0	10.0311	4.37036
stu-novel-miR-26	1049.16	-0.0294006	0.309139	-0.0951048	0.924232	0.987271	1327.47	799.269	1218.78	851.127
stu-novel-miR-87	17.2666	0.0334905	0.35613	0.0940401	0.925077	0.987271	16.7916	16.8267	19.0591	16.3888
stu-novel-miR-16	43.0827	-0.0330219	0.354004	-0.0932811	0.92568	0.987271	41.0462	46.7409	32.0995	52.4443
stu-novel-miR-84	43.0827	-0.0330219	0.354004	-0.0932811	0.92568	0.987271	41.0462	46.7409	32.0995	52.4443
stu-novel-miR-27	7.21918	-0.0268548	0.311247	-0.0862814	0.931243	0.987271	7.46295	7.47854	3.00933	10.9259
stu-novel-miR-44	7.21918	-0.0268548	0.311247	-0.0862814	0.931243	0.987271	7.46295	7.47854	3.00933	10.9259
stu-novel-miR-149	84.2318	-0.0289576	0.335914	-0.0862052	0.931303	0.987271	72.7638	98.1558	74.2302	91.7775
stu-novel-miR-299	26.9872	-0.0293357	0.359277	-0.081652	0.934923	0.987271	30.7847	24.3052	32.0995	20.7592
stu-novel-miR-59	17.3399	-0.0277086	0.352475	-0.0786114	0.937342	0.987271	25.1875	10.283	12.0373	21.8518
stu-novel-miR-204	27.0515	-0.0281192	0.359346	-0.0782512	0.937628	0.987271	27.0532	28.0445	17.0529	36.0554
stu-novel-miR-21	90.3113	0.0241665	0.33284	0.0726069	0.942119	0.987271	80.2267	98.1558	81.2519	101.611
stu-novel-miR-81	90.3113	0.0241665	0.33284	0.0726069	0.942119	0.987271	80.2267	98.1558	81.2519	101.611
stu-novel-miR-82	25.15	0.0234759	0.359313	0.0653356	0.947907	0.987271	31.7175	17.7615	27.084	24.037
stu-novel-miR-243	41.6176	0.022379	0.353145	0.0633707	0.949471	0.987271	41.9791	40.1971	47.1462	37.148
stu-novel-miR-164	42.8707	-0.0216244	0.353211	-0.0612224	0.951182	0.987271	51.3078	35.5231	43.1337	41.5184
stu-novel-miR-222	22.2794	0.0201882	0.356616	0.0566103	0.954856	0.987271	13.993	29.9142	32.0995	13.1111
stu-novel-miR-230	44.388	-0.0177841	0.354406	-0.05018	0.959979	0.987271	48.5092	41.132	31.0964	56.8146
stu-novel-miR-41	44.388	-0.0177841	0.354406	-0.05018	0.959979	0.987271	48.5092	41.132	31.0964	56.8146
stu-novel-miR-301	6.85272	-0.0148667	0.309793	-0.0479892	0.961725	0.987271	4.66434	9.34817	9.02799	4.37036
stu-novel-miR-43	110.554	0.0155791	0.325912	0.0478014	0.961875	0.987271	122.206	97.221	111.345	111.444
stu-novel-miR-294	65.7269	0.00911523	0.346175	0.0263312	0.978993	0.994557	74.6295	56.089	49.1524	83.0368
stu-novel-miR-203	23.5192	0.00935272	0.359224	0.0260359	0.979229	0.994557	19.5902	27.1097	20.0622	27.3147
stu-novel-miR-283	122.747	-0.00818082	0.336546	-0.0243082	0.980607	0.994557	161.386	85.0684	100.311	144.222
stu-novel-miR-184	15.7737	-0.00753848	0.354157	-0.0212857	0.983018	0.994557	16.7916	14.9571	16.0498	15.2962
stu-novel-miR-90	52.6045	-0.00669207	0.355086	-0.0188464	0.984964	0.994557	34.5161	71.0461	37.1151	67.7405
stu-novel-miR-272	406.351	0.00368459	0.308911	0.0119277	0.990483	0.995601	430.053	381.405	502.558	311.388
stu-novel-miR-208	15.3782	-0.00335327	0.352021	-0.00952576	0.9924	0.995601	17.7245	13.0874	11.0342	19.6666
stu-novel-miR-31	17.7111	-0.00160598	0.356455	-0.00450542	0.996405	0.996405	17.7245	17.7615	20.0622	15.2962
